# Supplementary material
Source: publisher figshare collection journal article supplement (https://tandf.figshare.com/articles/dataset/_/7152566)

# Appendix B

Coordinates and stratigraphic profiles of the 49 studied peatlands

## Coordinates of sampling sites (where peat cores were taken)

| peatland ID | peatland name                   | latitude | longitude |
|-------------|---------------------------------|----------|-----------|
| M14         | Kesselbruch                     | 51,90990 | 14,23516  |
| M17         | Trockenes Lauch                 | 51,90896 | 14,24032  |
| M26         | Grosse Kobbelke                 | 52,09769 | 14,54542  |
| M27B        | Moor 2 O Klautzkensee           | 52,10336 | 14,53264  |
| M28         | Heide Langerlauch               | 52,10311 | 14,54869  |
| M29         | Kesselmoor N Ziskensee          | 52,10800 | 14,47062  |
| M31         | Moor SO Kruegersee              | 52,05794 | 14,46243  |
| M51         | Grosser Wiedel 2                | 51,95761 | 14,49706  |
| M116        | Kleine Zehme                    | 51,92608 | 14,22926  |
| M120        | Große Zehme                     | 51,93616 | 14,22925  |
| M131        | Meierei                         | 51,96029 | 14,33867  |
| M133        | Ziskensee                       | 52,10522 | 14,46880  |
| M137        | Moor SO Henzendorf/ Trautzke    | 52,03415 | 14,53623  |
| M170        | Calpenzmoor                     | 51,91007 | 14,49983  |
| M171        | Pastling                        | 51,91012 | 14,54396  |
| M172        | Kleinsee                        | 51,94379 | 14,50479  |
| M173        | Maschnetzlauch                  | 51,90808 | 14,59996  |
| M174        | Torfteich                       | 51,91095 | 14,61163  |
| M175        | Die Laie                        | 51,95421 | 14,49301  |
| M176        | Weisses Lauch                   | 51,93912 | 14,48630  |
| M177        | Die weitesten Läuchen 1         | 51,96471 | 14,47782  |
| M179        | Tuschensee                      | 51,95284 | 14,57761  |
| M180        | Die weitesten Läuchen 3         | 51,96430 | 14,47902  |
| M181        | Die weitesten Läuchen 2         | 51,96483 | 14,47662  |
| M287        | Tiefes Luch                     | 51,91710 | 14,23697  |
| M294        | Moor 1 SO Henzendorf            | 52,02944 | 14,53534  |
| M296        | Seilensee                       | 52,01155 | 14,52827  |
| M349        | Grosser Wiedel 1 .Die Laie (1.) | 51,95598 | 14,49376  |
| M350        | Kleiner Wiedel                  | 51,95538 | 14,48964  |
| M351        | Staakower Läuche                | 51,97592 | 14,41731  |
| M352        | Staakower Läuche                | 51,97531 | 14,41931  |
| M353        | Rohrlauch                       | 51,95879 | 14,48706  |
| M409        | Moor O Kleine Zehme             | 51,92887 | 14,23422  |
| M417        | Moor SO Klein Liebitz           | 51,95054 | 14,27740  |
| M420        | Moor S Tiefes Luch              | 51,91568 | 14,23659  |
| M423        | Poppenskerlauch                 | 51,93892 | 14,25699  |
| M426        | Am Butterweg                    | 51,93550 | 14,23134  |
| M430        | Kayngelauch                     | 51,93704 | 14,26148  |
| M434        | Moor S Kl. Liebitz              | 51,94731 | 14,27078  |
| M462        | Klautzkensee                    | 52,10034 | 14,52504  |
| M467        | Moor 3 SO Henzendorf            | 52,03096 | 14,53380  |
| M470        | Grosse Göhlenze                 | 52,01422 | 14,54398  |
| M516        | Trockenes Lauch                 | 51,95667 | 14,49343  |
| M520        | Wiesenlauch                     | 51,96229 | 14,48385  |
| M521        | Staakower Läuche                | 51,97431 | 14,42547  |
| M523        | Moor W Reicherskreuzer          | 52,03095 | 14,53363  |
| M524        | Grabkower Seewiesen             | 51,91330 | 14,57628  |
| M619        | Moor O Calpenz (Hasenluch)      | 51,90921 | 14,51079  |
| M626        | Moor S Grosse Zehme             | 51,92921 | 14,22832  |

Coordinates in WGS 84, hddd.ddddd°

## Abbreviations (german and english)

|                      |                                                                        |                                        |
|----------------------|------------------------------------------------------------------------|----------------------------------------|
| H1-10                | Humifizierungsgrad des Torfes*                                         | Decomposition degree of peat           |
| K1-5                 | Konsistenz der Mudde*                                                  | Consistency of gyttja                  |
| mu                   | muddig                                                                 | "muddy", contains much gyttja          |
| wa                   | wässrig                                                                | watery                                 |
| tr                   | trocken                                                                | dry                                    |
| Ho                   | Holz                                                                   | wood                                   |
| Aln                  | Erlenholz                                                              | Alder wood                             |
| Bi                   | Birkenholz                                                             | Birch                                  |
| Ki, KiN, KSR, KiKnos | Kiefernholz, Kiefernadeln, Kiefernspiegelrinde, Kiefernknospenschuppe? | Pine needles, bark, buds               |
| EW                   | Ericaceenwurzeln                                                       | <i>Ericaceae</i> roots                 |
| Oxy                  | Moosbeerenrhizome/-blättchen                                           | <i>Oxycoccus</i> rhizomes, leaves      |
| And                  | Rosmarinheide-Blättchen                                                | <i>Andromeda</i> leaves                |
| Er                   | Wollgras (unbestimmt)                                                  | <i>Eriophorum</i>                      |
| Er an                | Schmalblättriges Wollgras                                              | <i>Eriophorum angustifolium</i>        |
| Er va                | Scheidiges Wollgras                                                    | <i>Eriophorum vaginatum</i>            |
| Rad                  | Radizellen                                                             | (sedge) roots                          |
| Tm                   | Torfmoos                                                               | peat moss                              |
| Cym                  | sektion Cymbifolia                                                     | peat moss (section Cymbifolia)         |
| Caltrif              | Calliergon trifarium                                                   | brown moss (Calliergon trifarium)      |
| Drep                 | Krummmoos (Drepanocladus-Gruppe)                                       | brown moss of Drepanocladus group      |
| Bm                   | Braunmoos                                                              | brown moss                             |
| Eq                   | Schachtelhalm                                                          | <i>Equisetum</i>                       |
| Nym                  | Seerosensamen                                                          | <i>Nymphaea</i> seeds                  |
| Fi                   | Fiebertkleesamen                                                       | <i>Menyanthes</i> seeds                |
| Naj                  | Nixkrautfrüchte                                                        | <i>Najas</i> fruits                    |
| Nuph                 | Teichrosensamen/-rhizome                                               | <i>Nuphar</i> seed/rhizomes            |
| Pot                  | Laichkrautsamen                                                        | <i>Potamogeton</i> seed                |
| Mol                  | Pfeifengras                                                            | <i>Molinia</i>                         |
| Sch                  | <i>Scheuchzeria</i>                                                    | <i>Scheuchzeria</i>                    |
| Phr                  | Schilf                                                                 | Reed/ <i>Phragmites</i>                |
| LB                   | Laubblattreste                                                         | leave fragments                        |
| Fa                   | Farn ( <i>Thelypteris</i> )                                            | fern ( <i>Thelypteris</i> )            |
| Poly                 | <i>Polytrichum</i> spec.                                               | brown moss ( <i>Polytrichum</i> spec.) |
| Brandschicht         | Brandschicht                                                           | charcoal layer                         |

|           |                                                                                     |                                                                               |                                 |                                                                                     |                                                       |
|-----------|-------------------------------------------------------------------------------------|-------------------------------------------------------------------------------|---------------------------------|-------------------------------------------------------------------------------------|-------------------------------------------------------|
| Hms       | 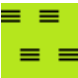    | Torfmoostorf<br>Peat moss ( <i>Sphagnum</i> ) peat                            | HI                              | 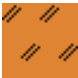    | Holztorf<br>wood peat                                 |
| Hkrc-Hms  | 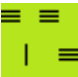   | Radizellen - Torfmoostorf<br>sedge - peat moss peat                           | Hkrc-HI                         | 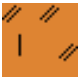   | Radizellen – Holztorf<br>sedge – wood peat            |
| Hkhe-Hms  | 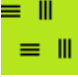   | Wollgras - Torfmoostorf<br><i>Eriophorum</i> – peat moss peat                 | Hihh                            | 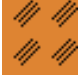   | Reisertorf (Zwergsträucher)<br>shrub peat             |
| Hihh-Hms  | 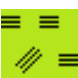   | Reiser – Torfmoostorf<br>shrub – peat moss peat                               | H <sub>z</sub> , H <sub>v</sub> | 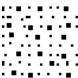   | zersetzer, vererdeter Torf<br>highly degraded peat    |
| Hmb       | 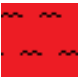   | Braunmoostorf<br>brown moss peat                                              | Fh                              | 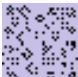   | Organomudde/Detritusmudde<br>organic gyttja           |
| Hkrc-Hmb  | 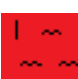   | Radizellen – Braunmoostorf<br>sedge – brown moss peat                         | Fhf                             | 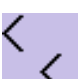   | Feindetritusmudde<br>organic gyttja (fine)            |
| Hkhe      | 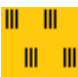   | Wollgrastorf<br><i>Eriophorum</i> peat                                        | Fhm                             | 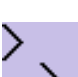   | Mitteldetritusmudde<br>organic gyttja (medium)        |
| Hms-Hkhe  | 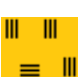   | Torfmoos – Wollgrastorf<br>peat moss – <i>Eriophorum</i> peat                 | Fhg                             | 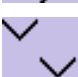   | Grobdetritusmudde<br>organic gyttja (coarse)          |
| Hkrc-Hkhe | 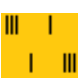   | Radizellen - Wollgrastorf<br>sedge – <i>Eriophorum</i> peat                   | Fhl                             | 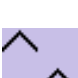   | Lebermudde<br>organic gyttja („liver“-like)           |
| Hkrc      | 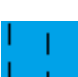  | Radizellentorf<br>sedge peat                                                  | Fm                              | 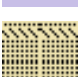  | Silikatmudde<br>silicate gyttja                       |
| Hkhe-Hkrc | 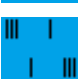 | Wollgras – Radizellentorf<br><i>Eriophorum</i> – sedge peat                   | Fmt                             | 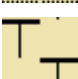 | Tonmudde<br>silicate gyttja (clay)                    |
| Hkrp-Hkrc | 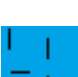 | Schilf – Radizellentorf<br><i>Phragmites</i> – sedge peat                     | Fmu                             | 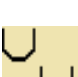 | Schluffmudde<br>silicate gyttja (silt)                |
| Hmb-Hkrc  | 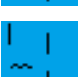 | Braunmoos - Radizellentorf<br>brown moss – sedge peat                         | Fms                             | 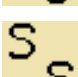 | Sandmudde<br>silicate gyttja (sand)                   |
| Hms-Hkrc  | 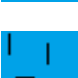 | Torfmoos – Radizellentorf<br>peat moss – sedge peat                           | Fm.lamin                        | 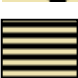 | Silikatmudde, laminiert<br>Silicate gyttja, laminated |
| Hkha      | 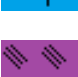 | <i>Scheuchzeria</i> - Torf<br><i>Scheuchzeria</i> peat                        | fS                              | 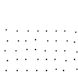 | Feinsand<br>sand (fine grains)                        |
| Hms-Hkha  | 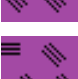 | Torfmoos – <i>Scheuchzeria</i> - Torf<br>peat moss – <i>Scheuchzeria</i> peat | mS                              | 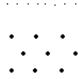 | Mittelsand<br>sand (medium grains)                    |
| Hkrc-Hkha | 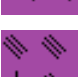 | Radizellen – <i>Scheuchzeria</i> - Torf<br>sedge – <i>Scheuchzeria</i> peat   | gS                              | 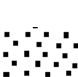 | Grobsand<br>sand (coarse grains)                      |
| Hkrp      | 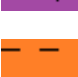 | Schilftorf<br><i>Phragmites</i> (reed) peat                                   | W                               | 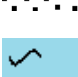 | Wasser<br>water                                       |
| Hkrc-Hkrp | 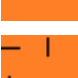 | Radizellen – Schilftorf<br>sedge – <i>Phragmites</i> peat                     |                                 |                                                                                     |                                                       |

# M 14

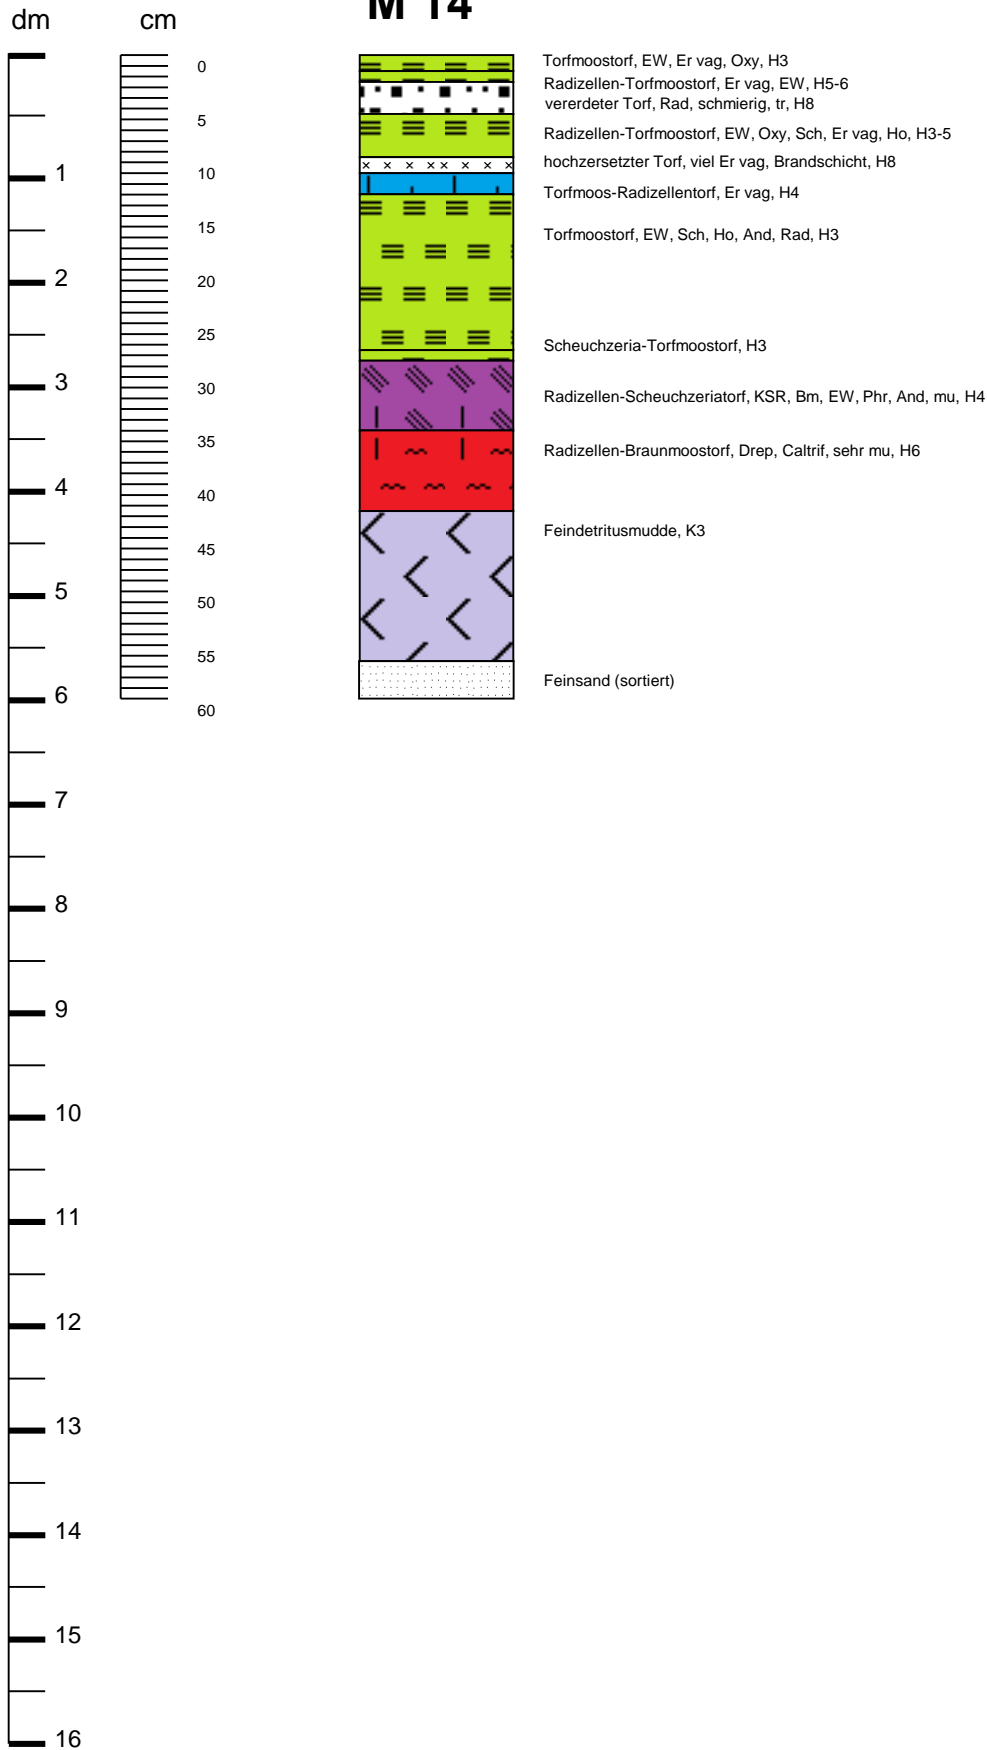

# M 17

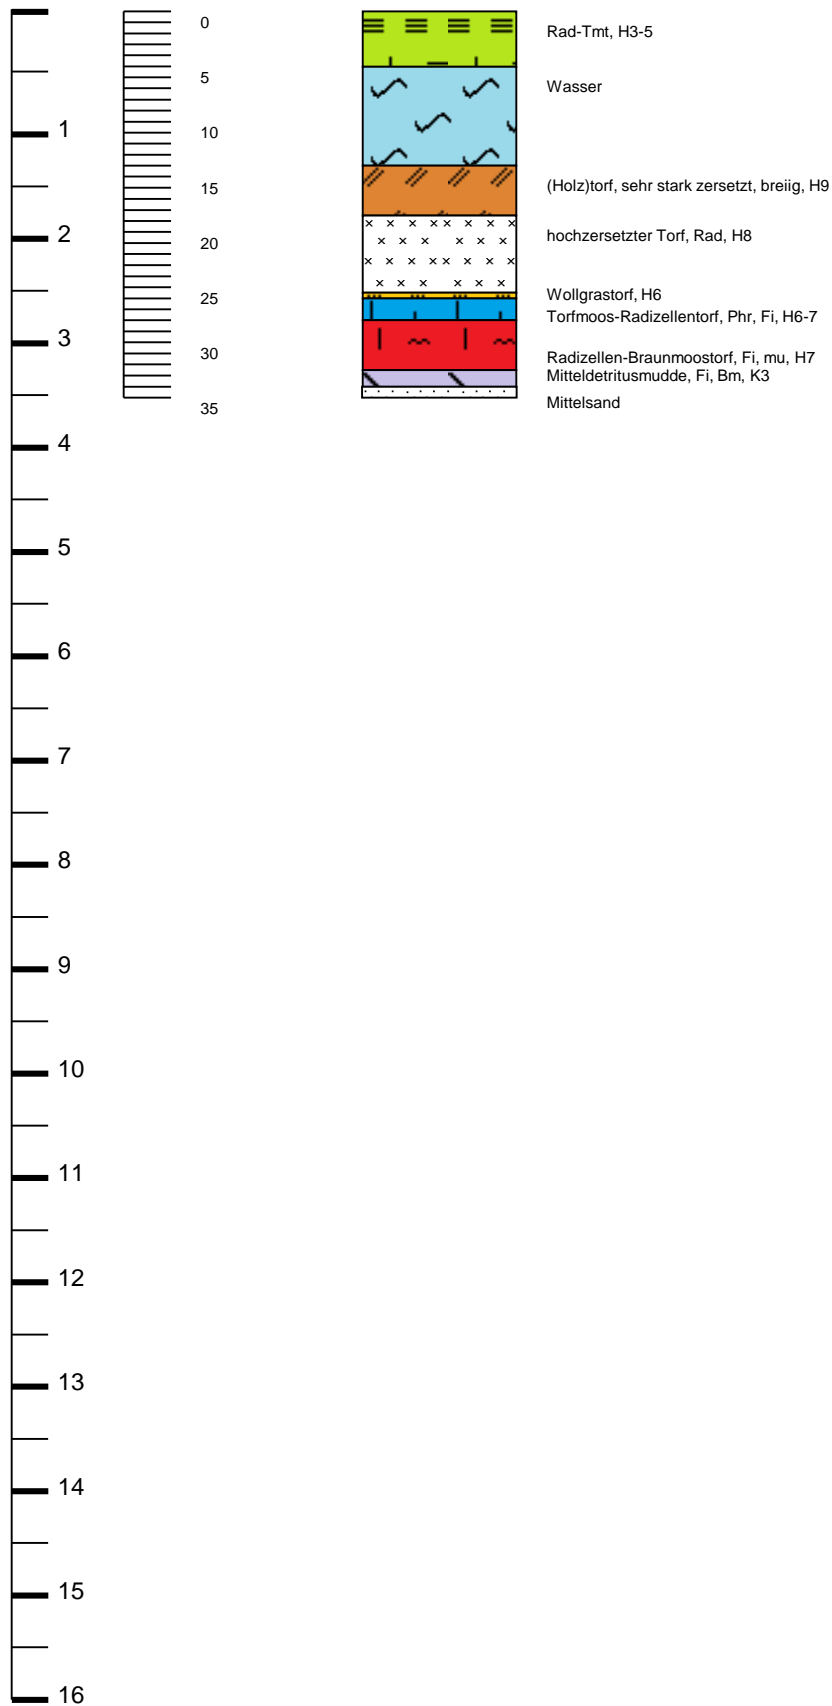

# M 26

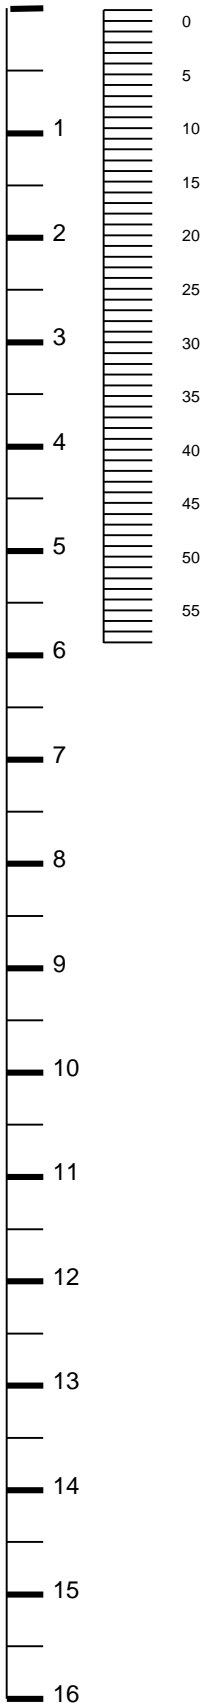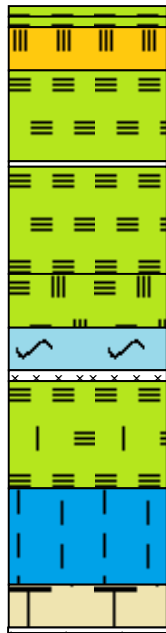

Torfmoostorf, mul, H5  
 Radizellen-Torfmoostorf, EW, Er vag, mu, H4  
 Torfmoos-Wollgrastorf, Rad, EW, Oxy, H3

Torfmoostorf, EW, Oxy, Er vag, H2

hochzersetzer Torf, Rad, Tm, mu, H8

Torfmoostorf, Rad, EW, tw mu, , H3-4

Wollgras-Torfmoostorf, Oxy, EW, wa, H3-4

Wasser

hochzersetzer Torf, Rad, mul, wa

Radizellen-Torfmoostorf, Ho, Sch, EW, Er vag, mul, H7-8

Radzellentorf, Ho, Tm-Sporenkapsel, Fi, H7

Tonmudde  
 Feinsand

# M 27B

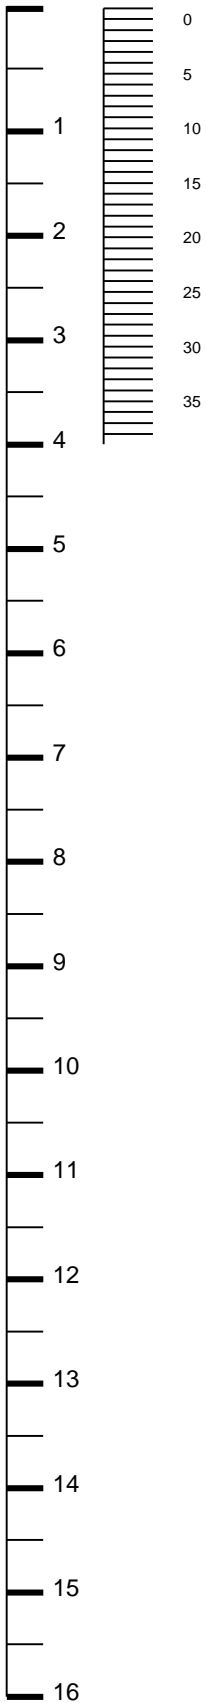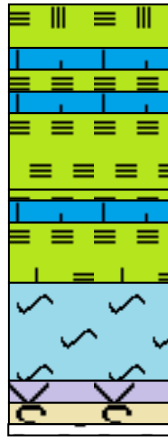

Wollgras-Torfmoostorf, Er ang, Poly, Oxy, EW H3-4

Torfmoos-Radizellentorf, Ho,Oxy, Bi, mu!, H7

Torfmoostorf, KSR, Sch, KiZa, Oxy, Ho, H4

Torfmoos-Radizellentorf, Sch, Oxy, mu!, H5

Torfmoostorf, EW, Sch, Oxy, KSR, H3-4

Radizellen-Torfmoostorf, Oxy, Sch, wa, mu, H3

Radizellentorf, Ho, Bi, Oxy, mu!, H8

Radizellen-Torfmoostorf, KSR, Sch, wa, mu!, H7

Wasser

Grobdetritusmudde, KiN, KSR, Sand, K2

Mix: Mudde, Mittelsand, Rad, KiN, KiZweige, KSR

Grobsand, Ho

# M 28

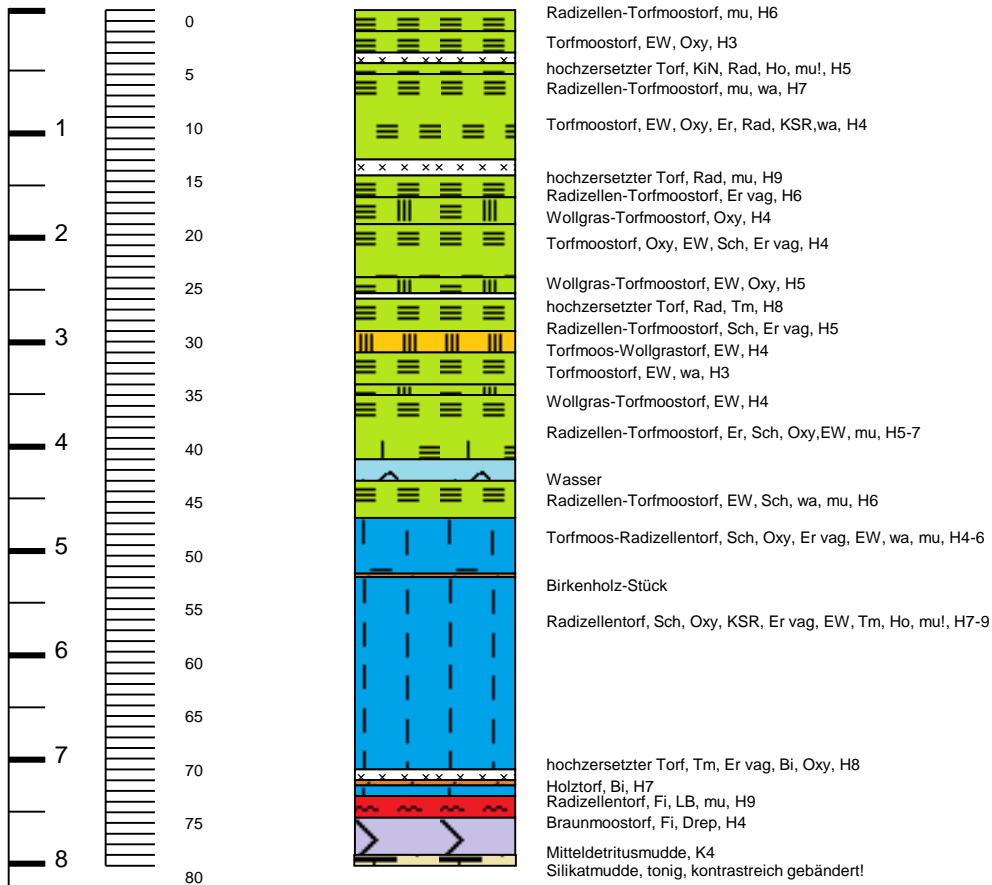

# M 29

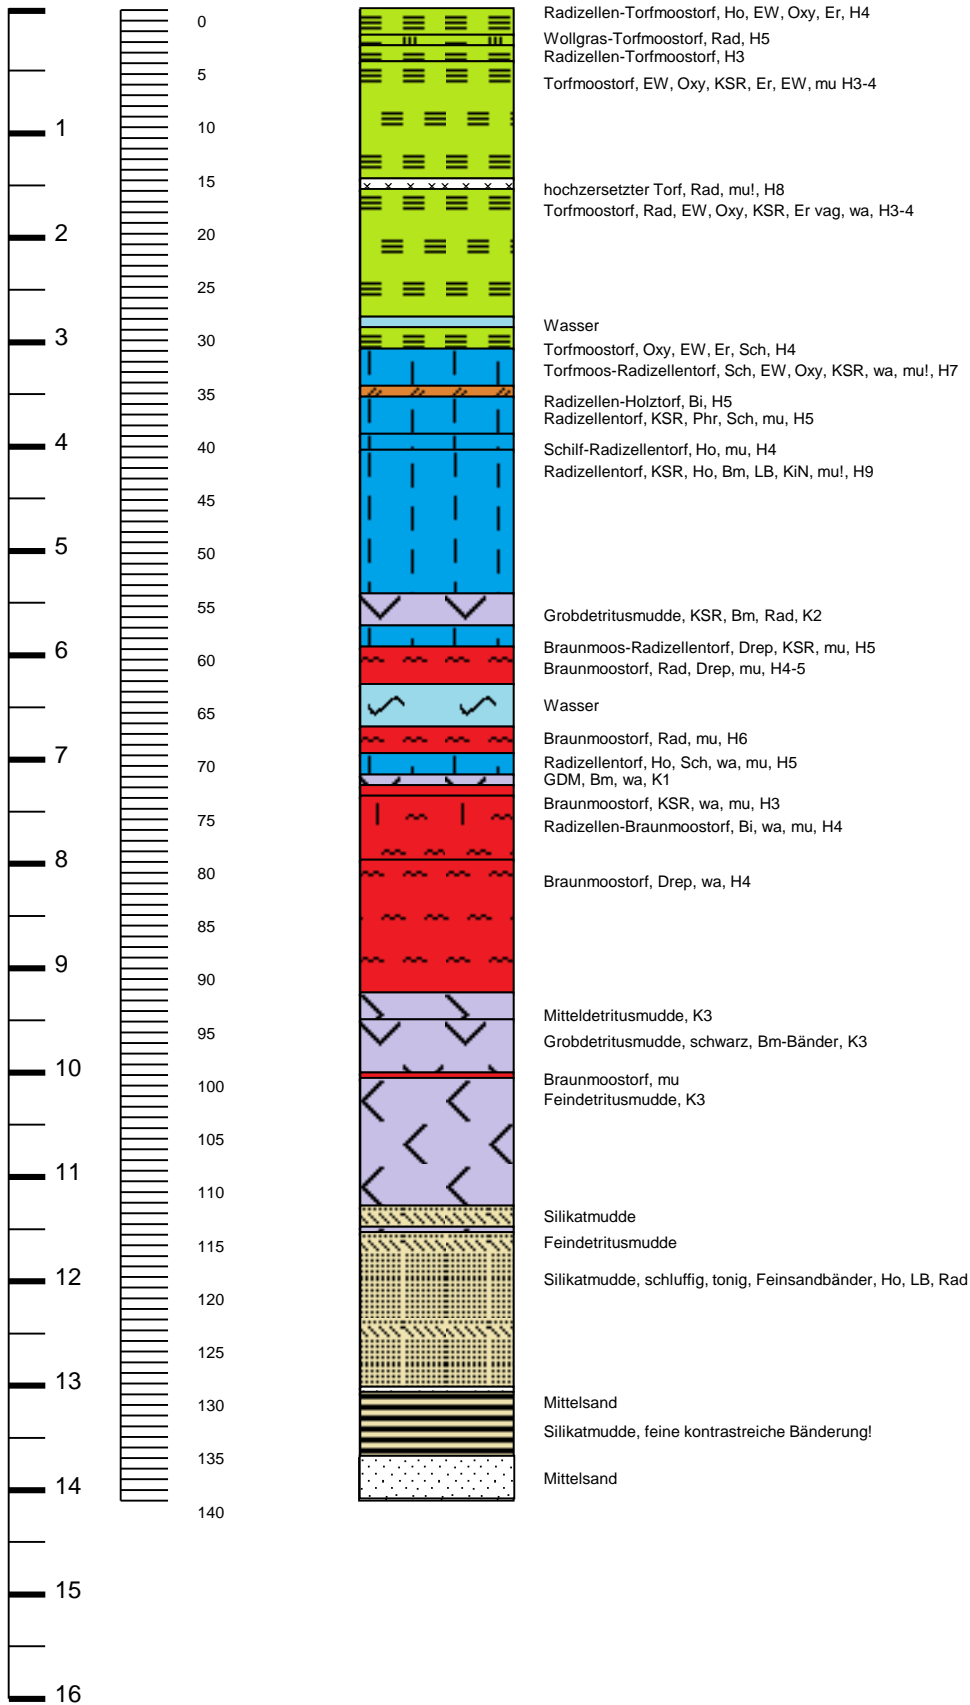

# M 31

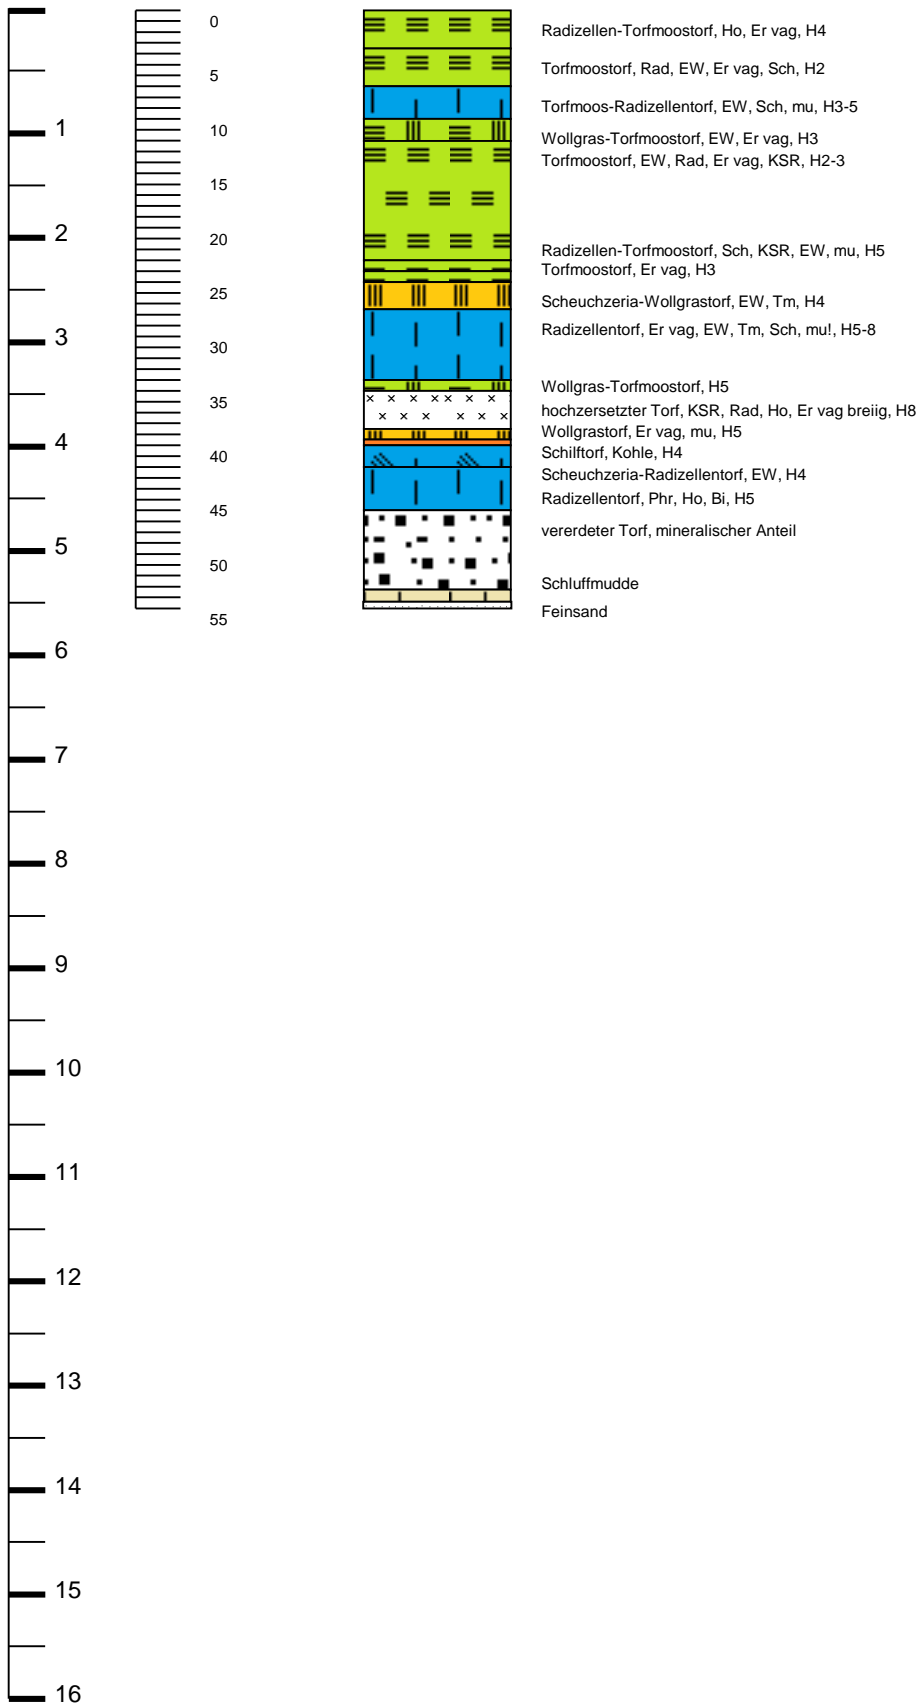

# M 51

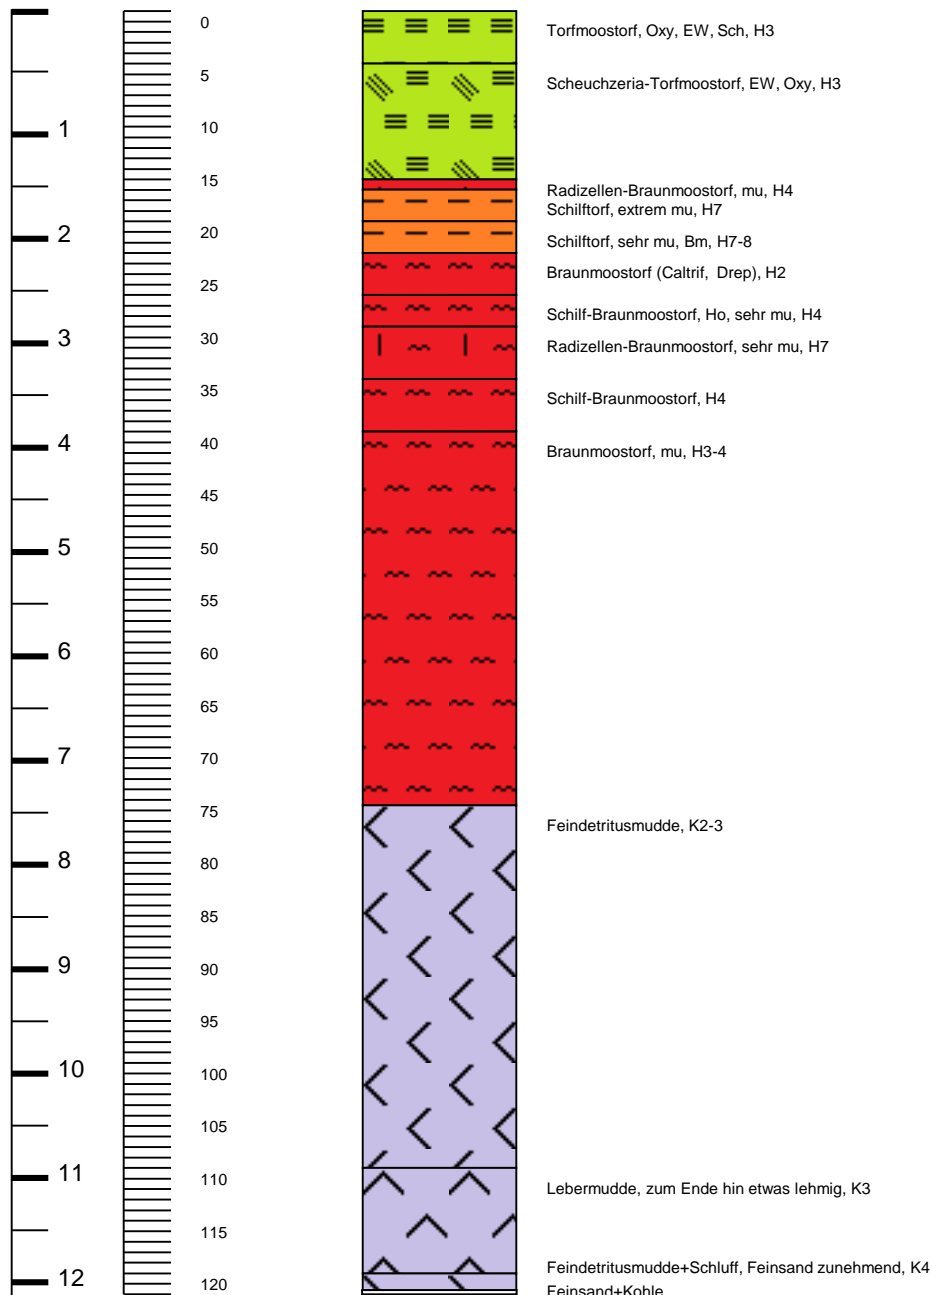

# M 116

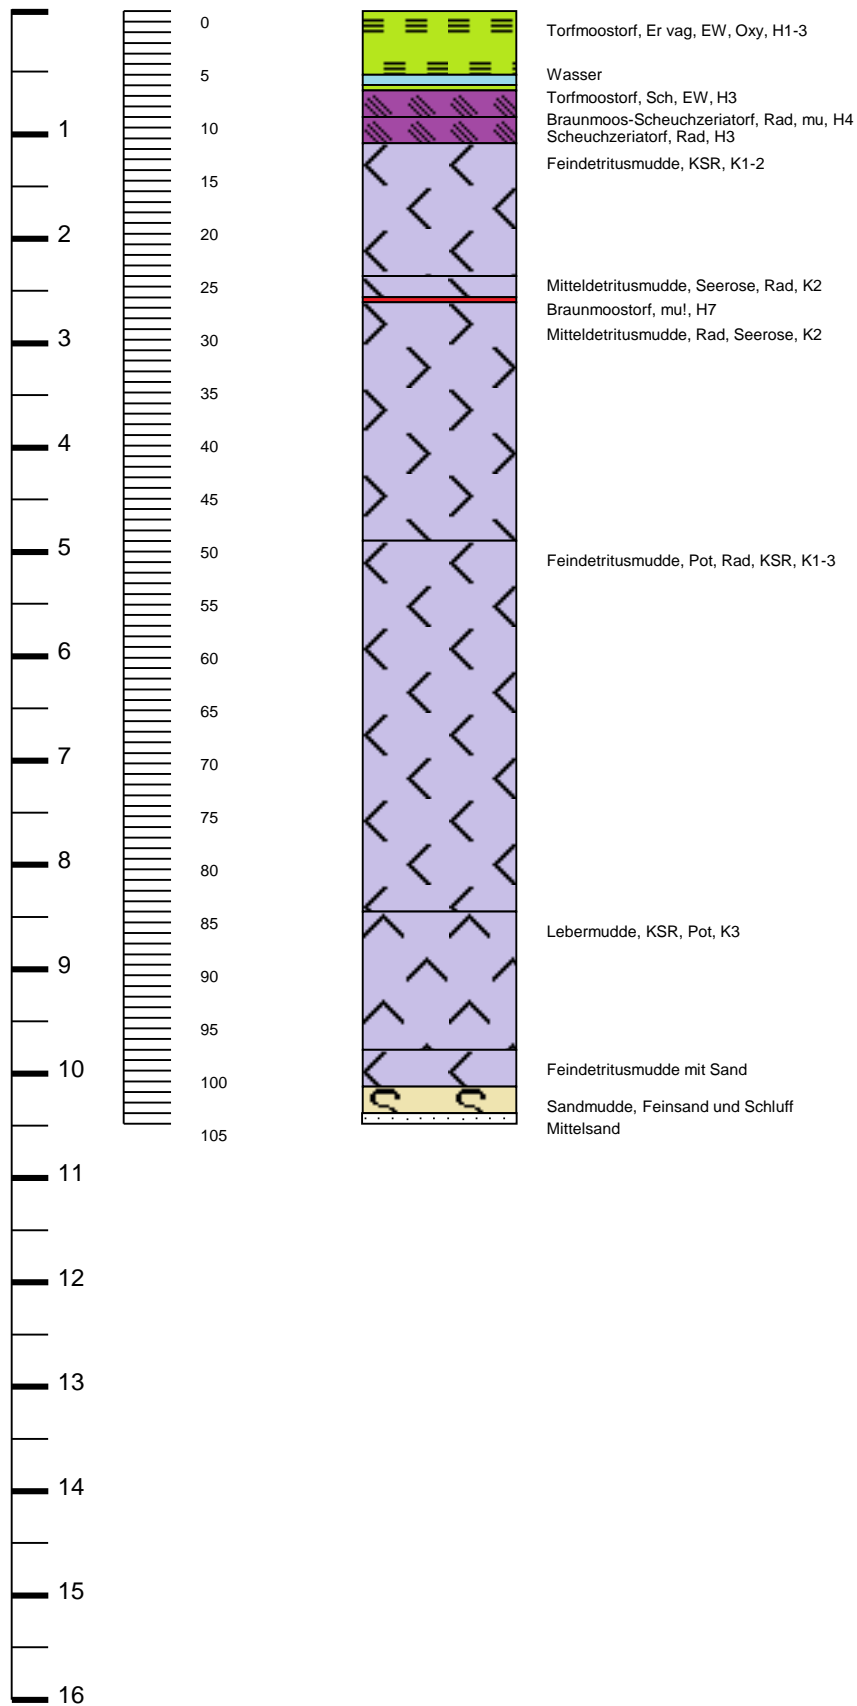

# M 120

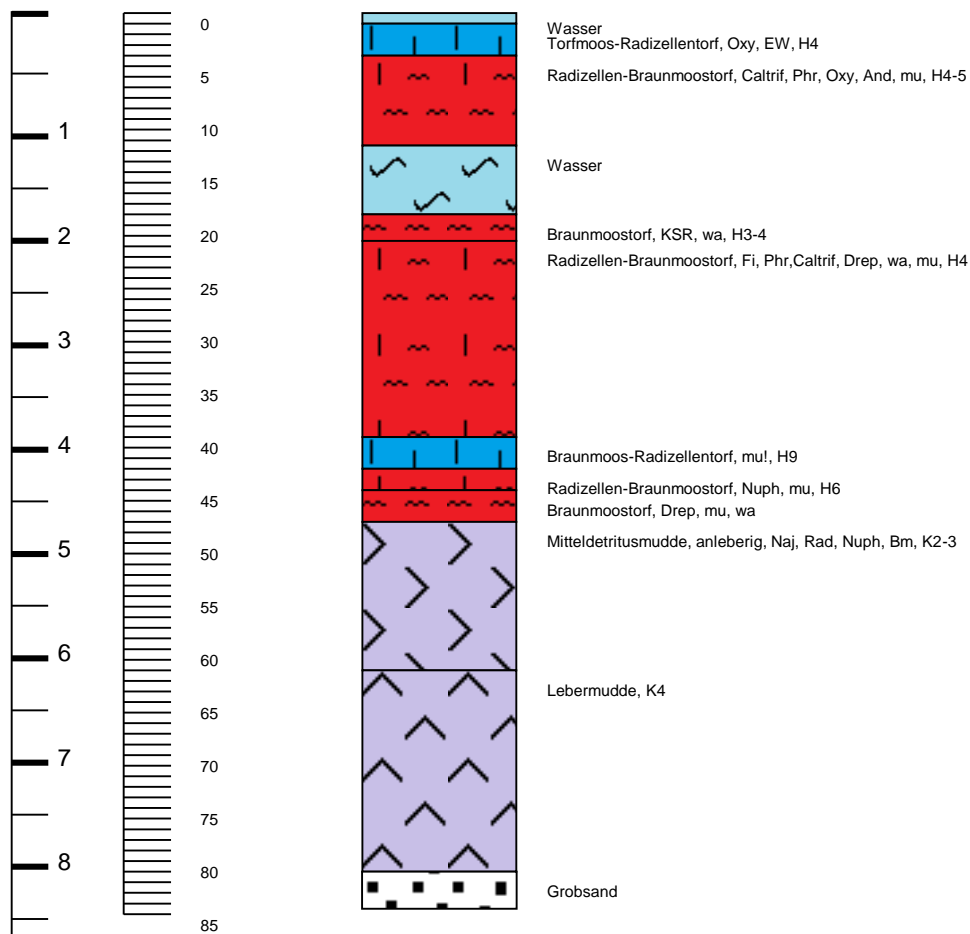

# M 131

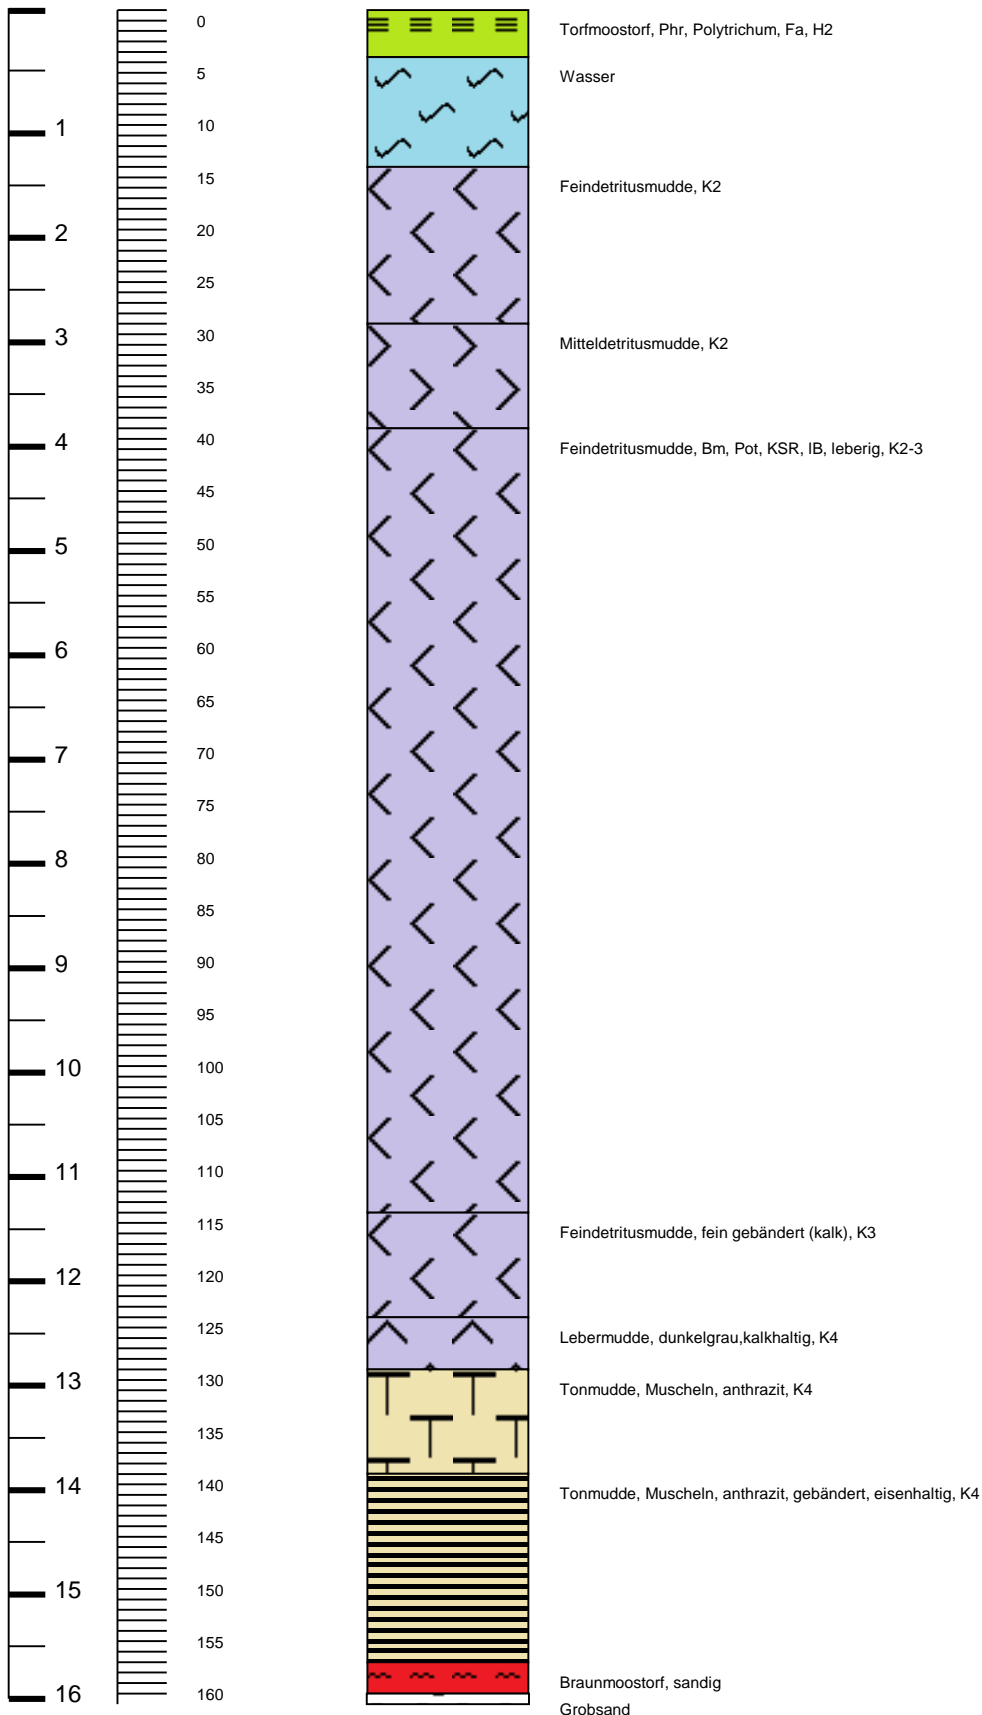

# M 133

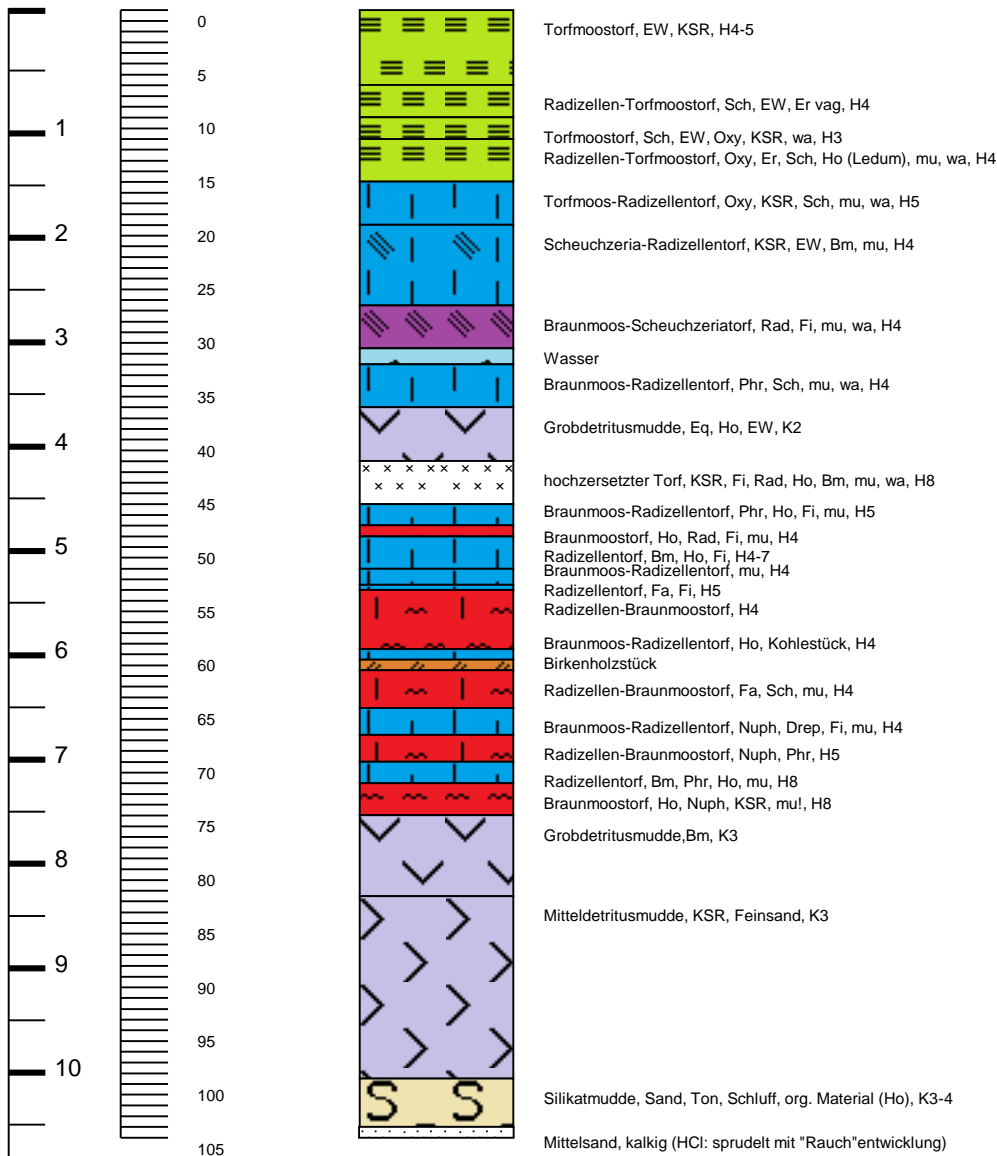

# M 137

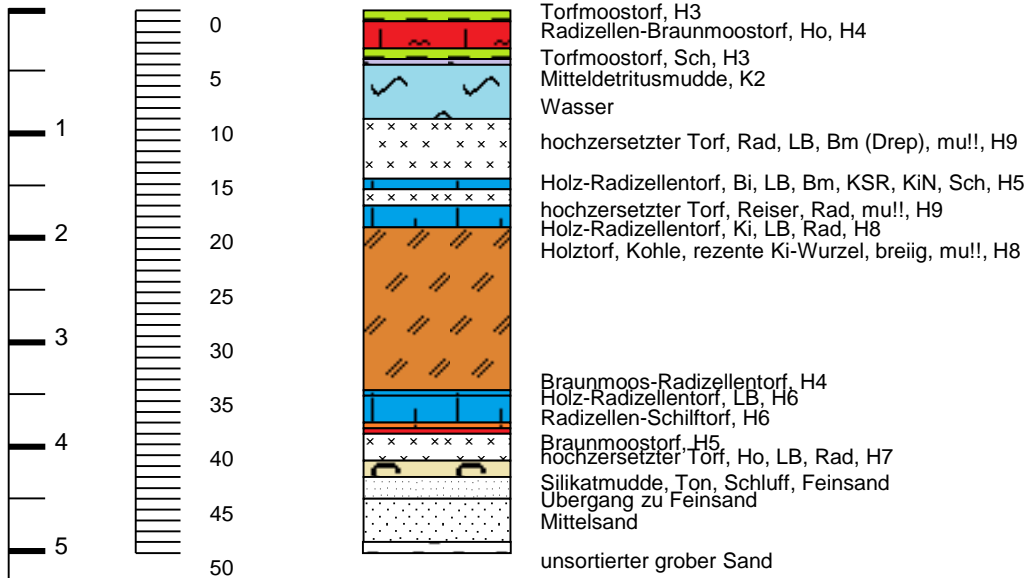

# M 170

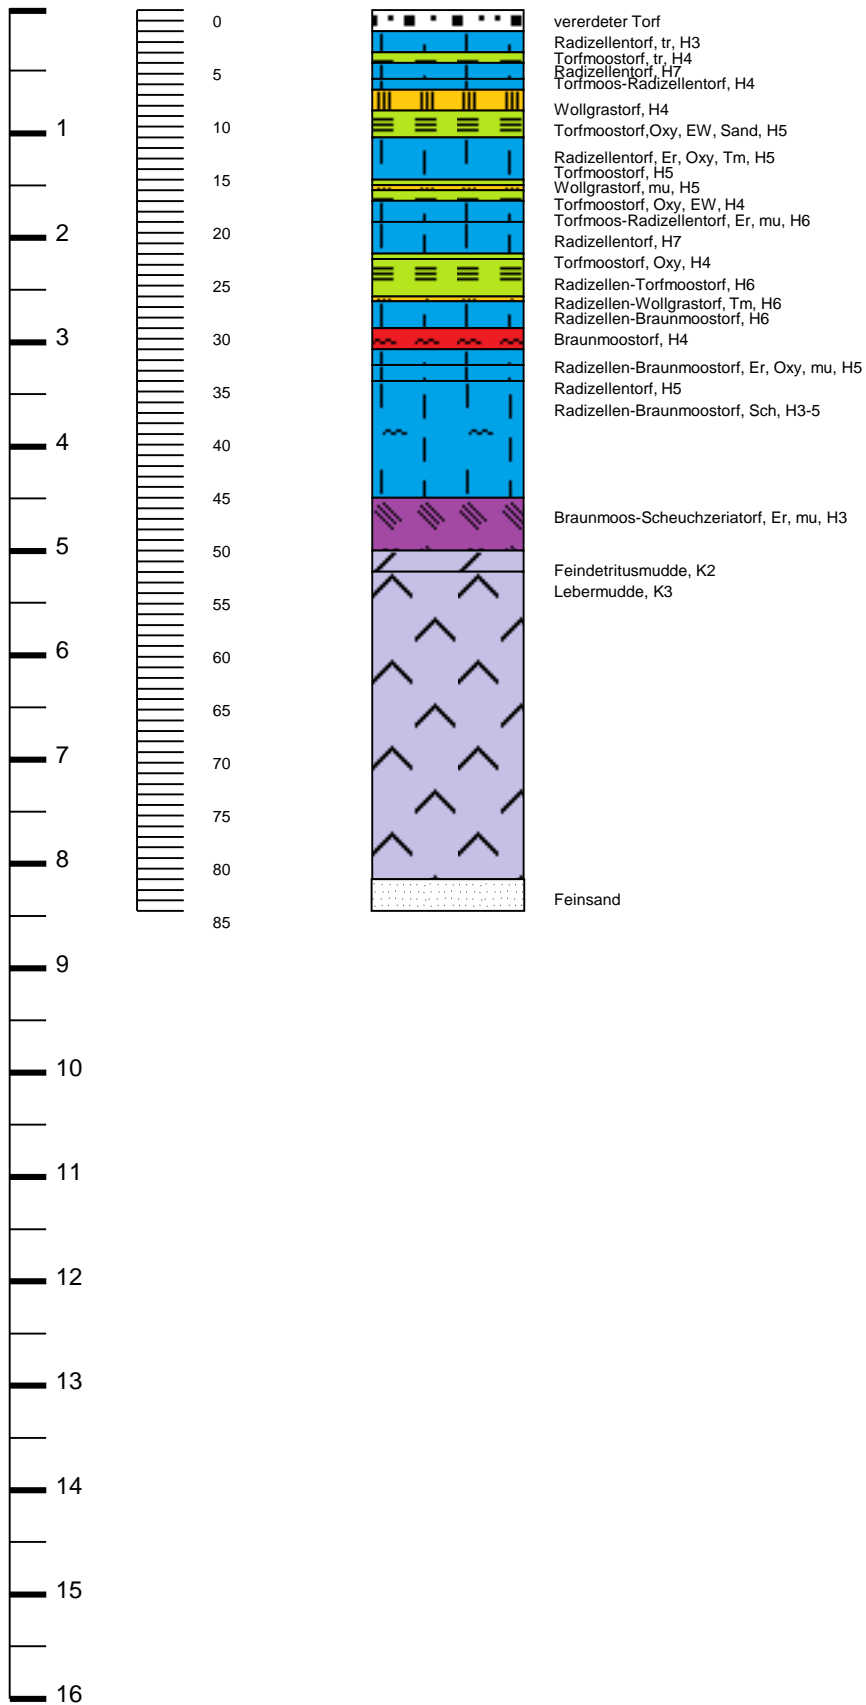

# M 171

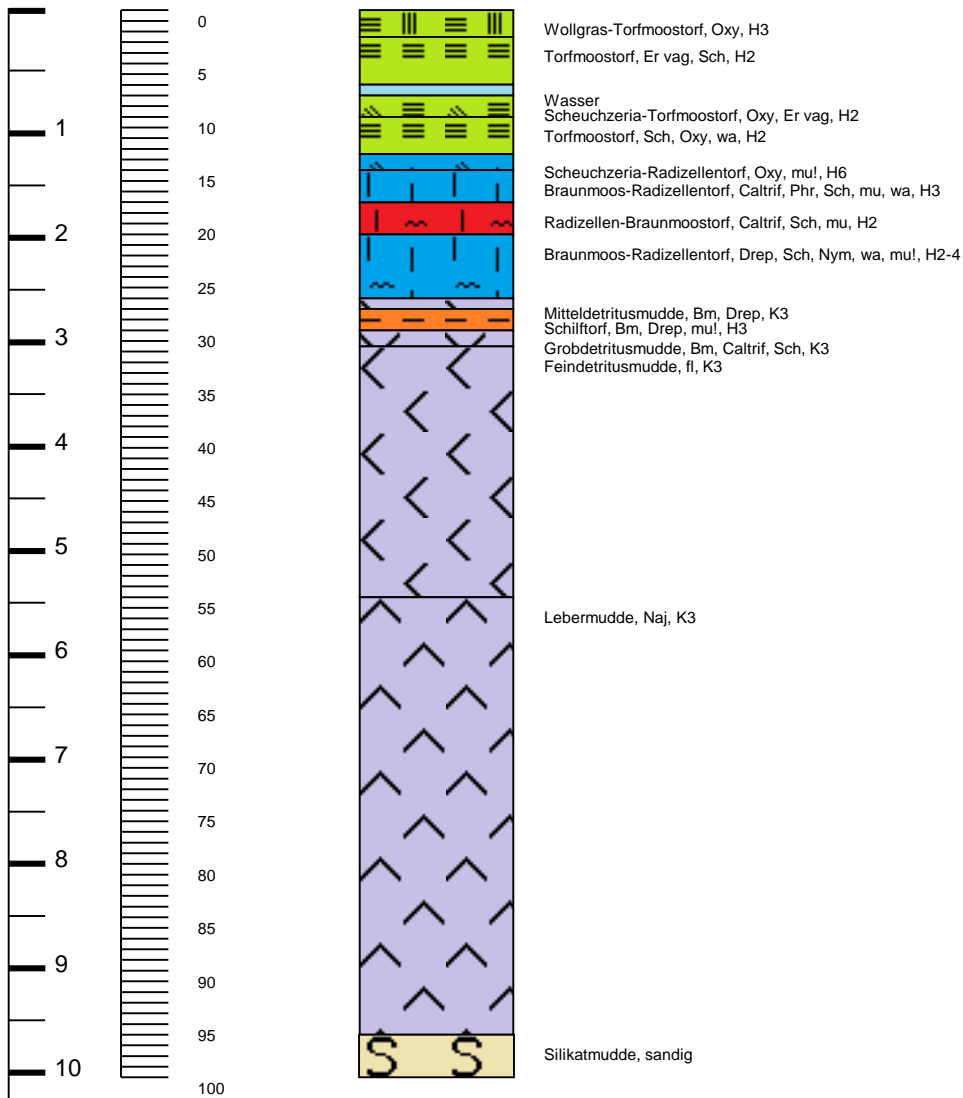

# M 172

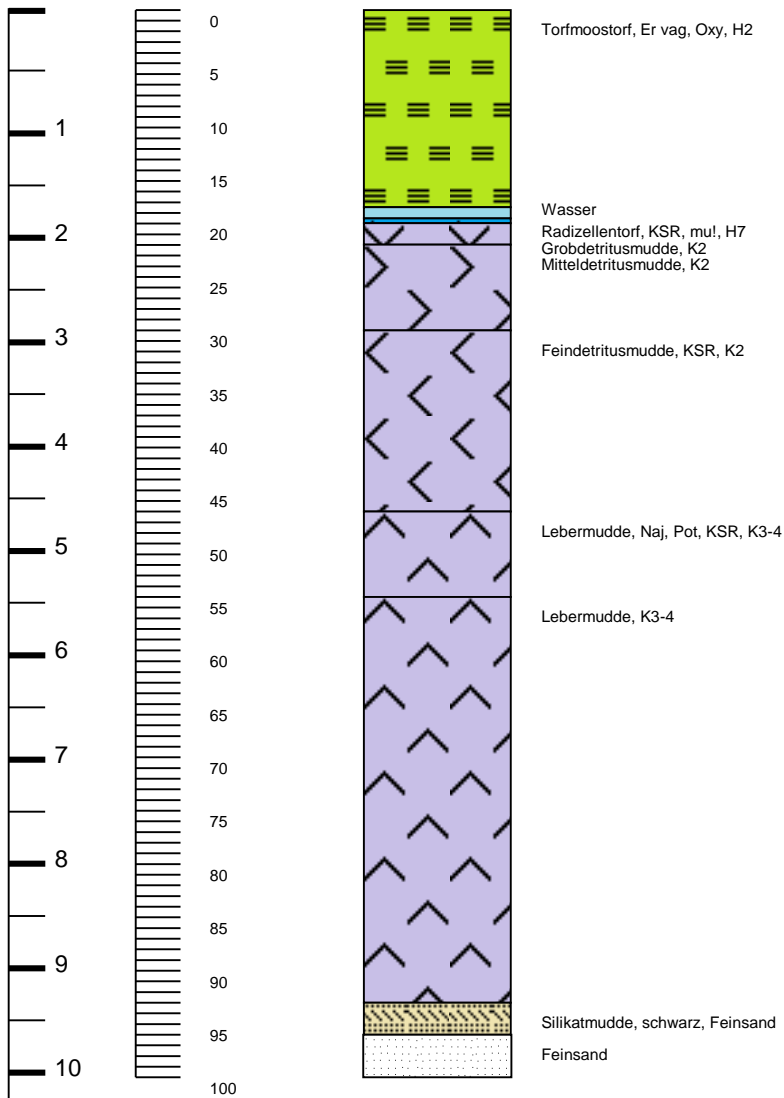

# M 173

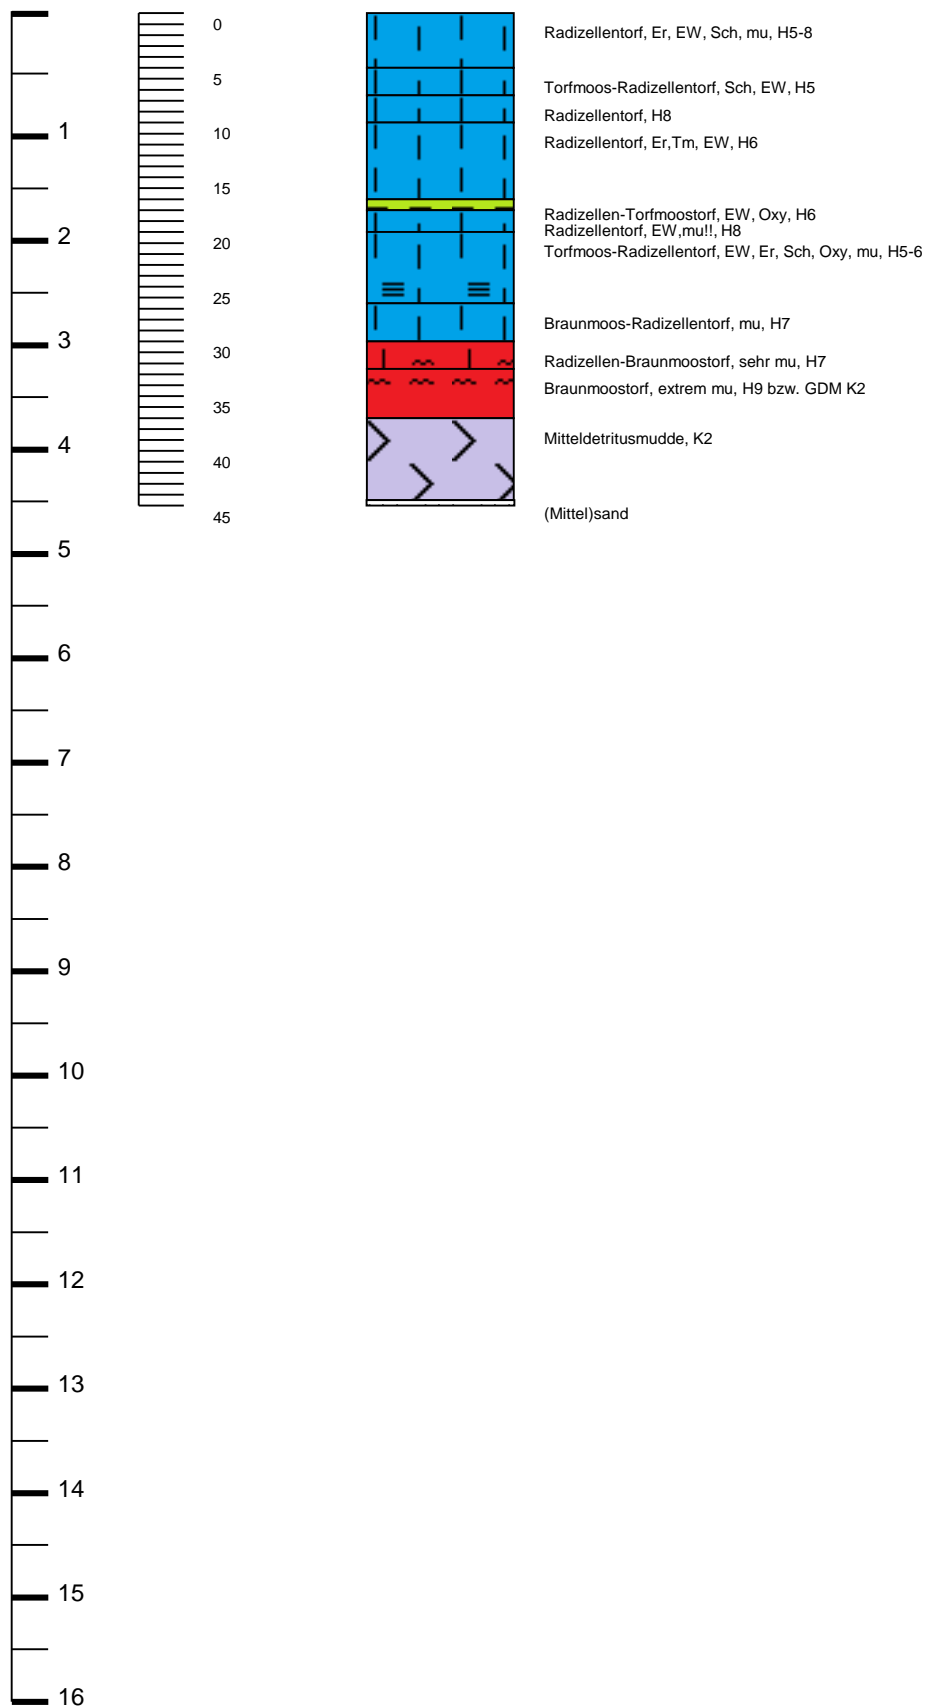

# M 174

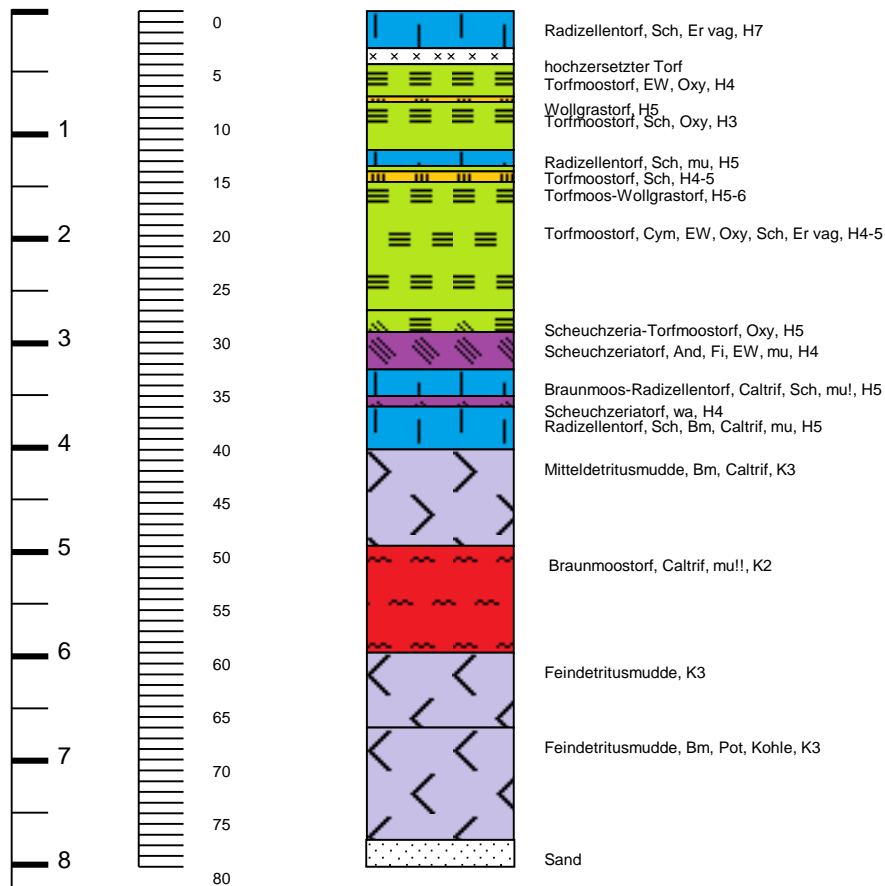

# M 175

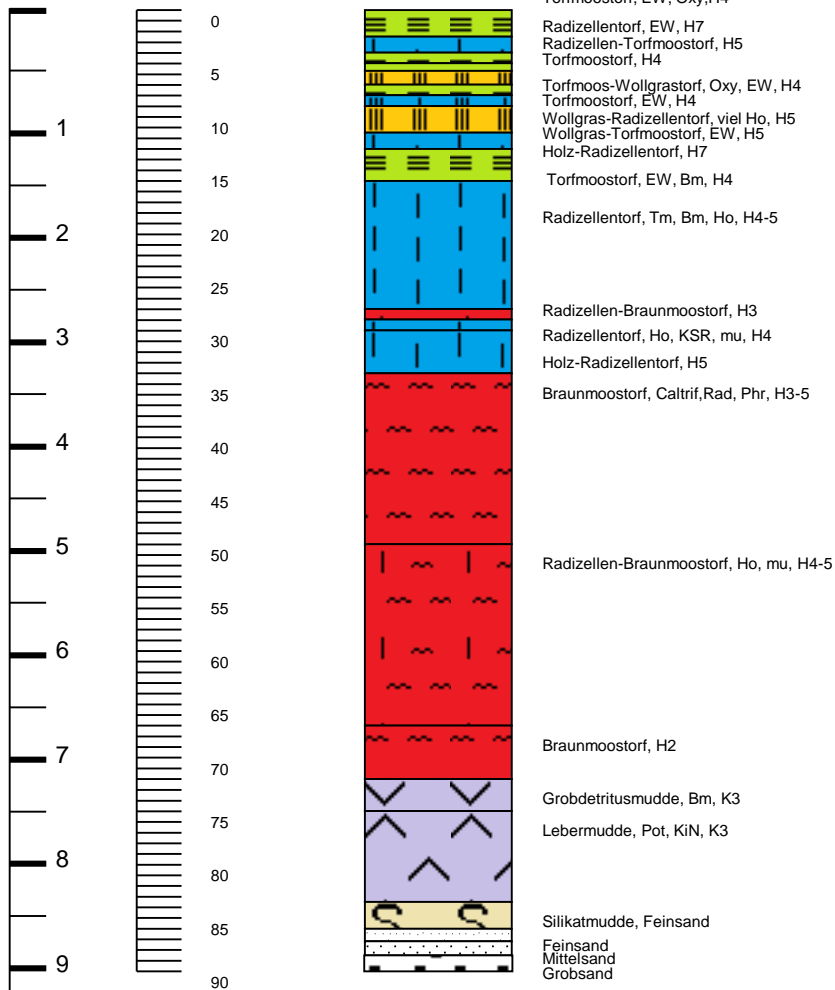

# M 176

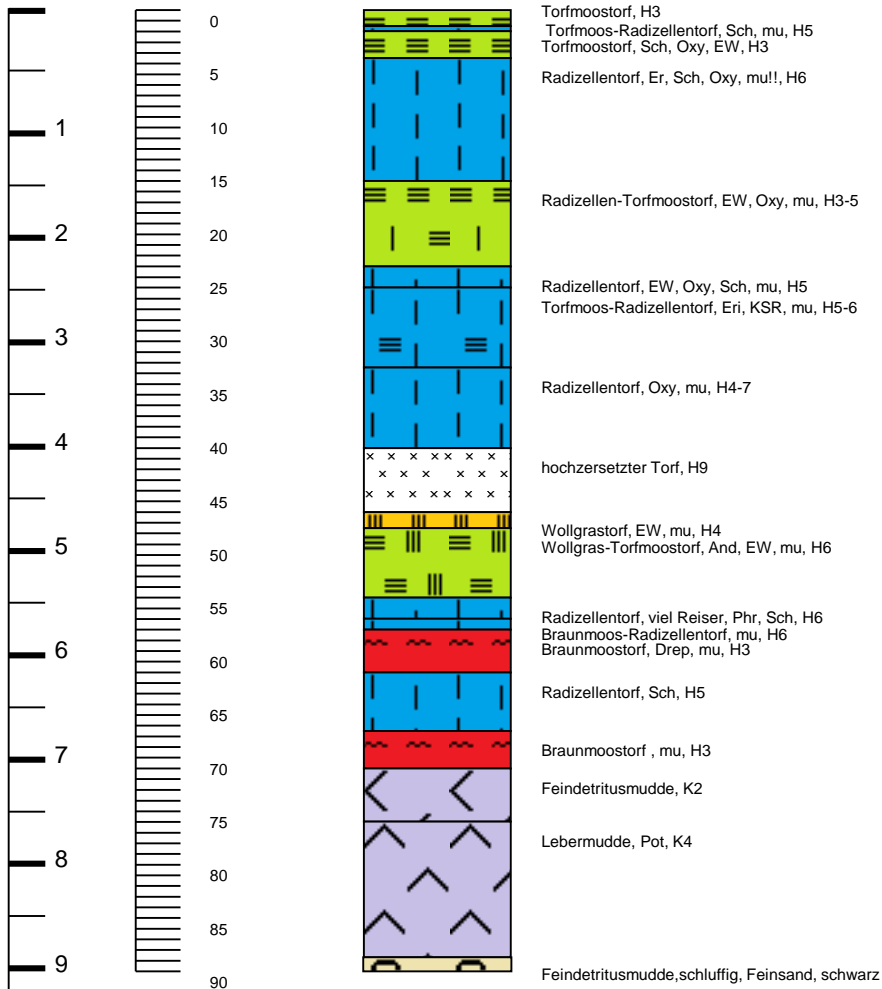

# M 177

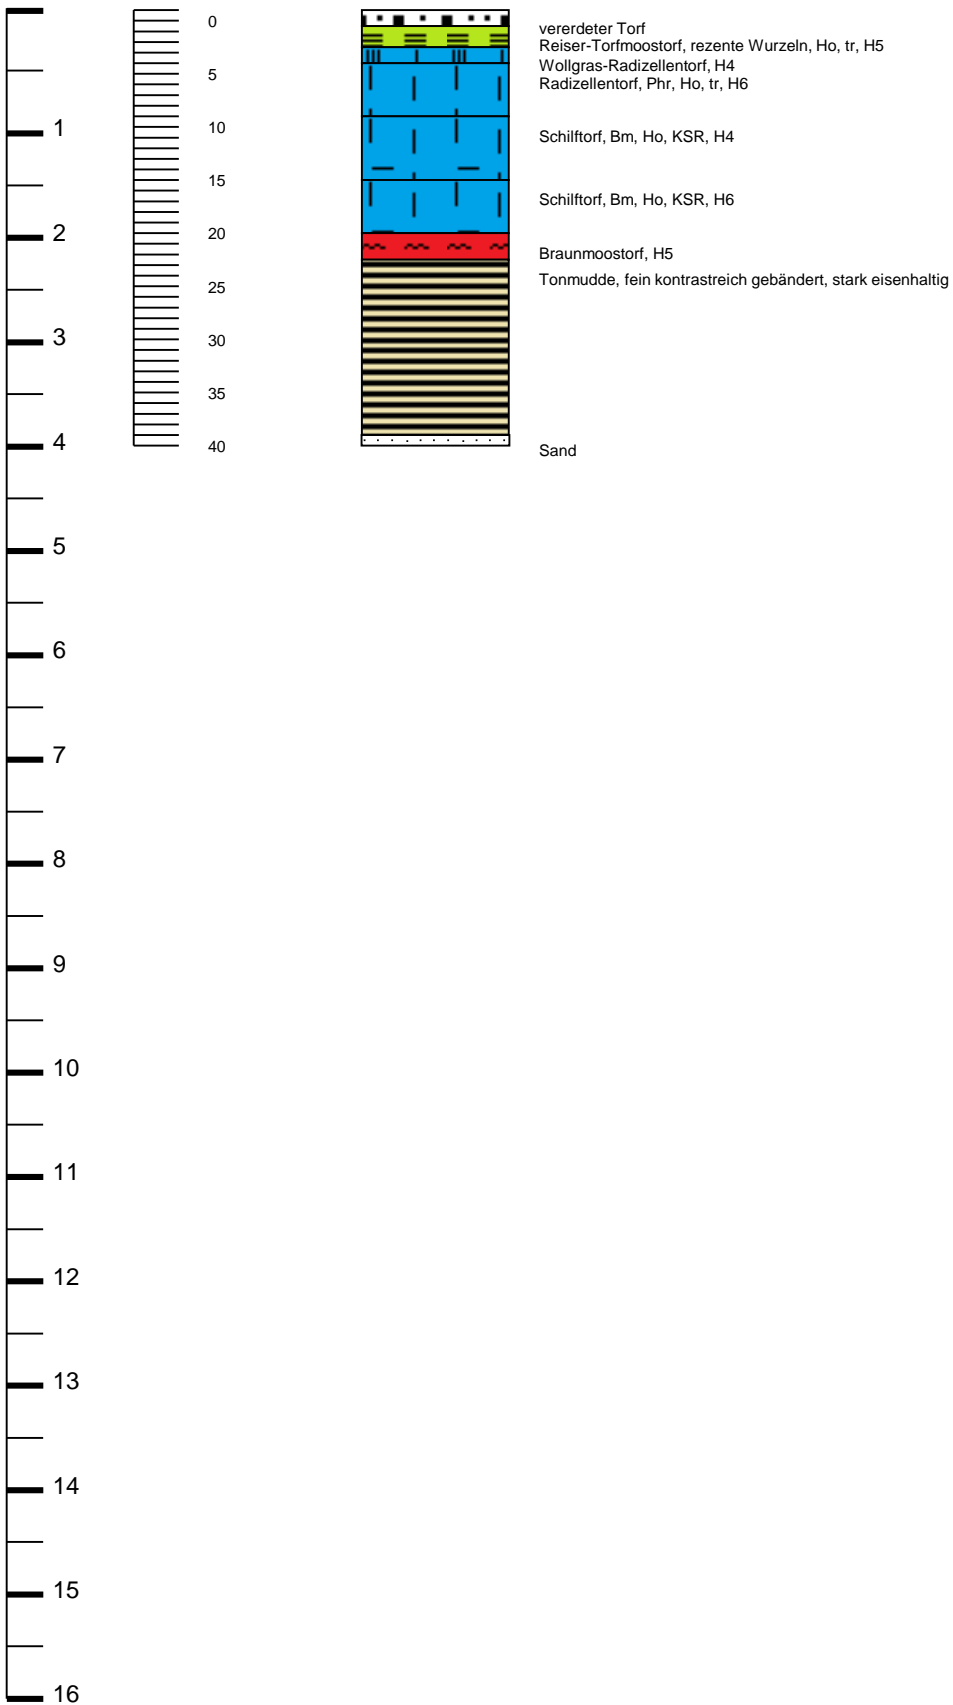

# M 179

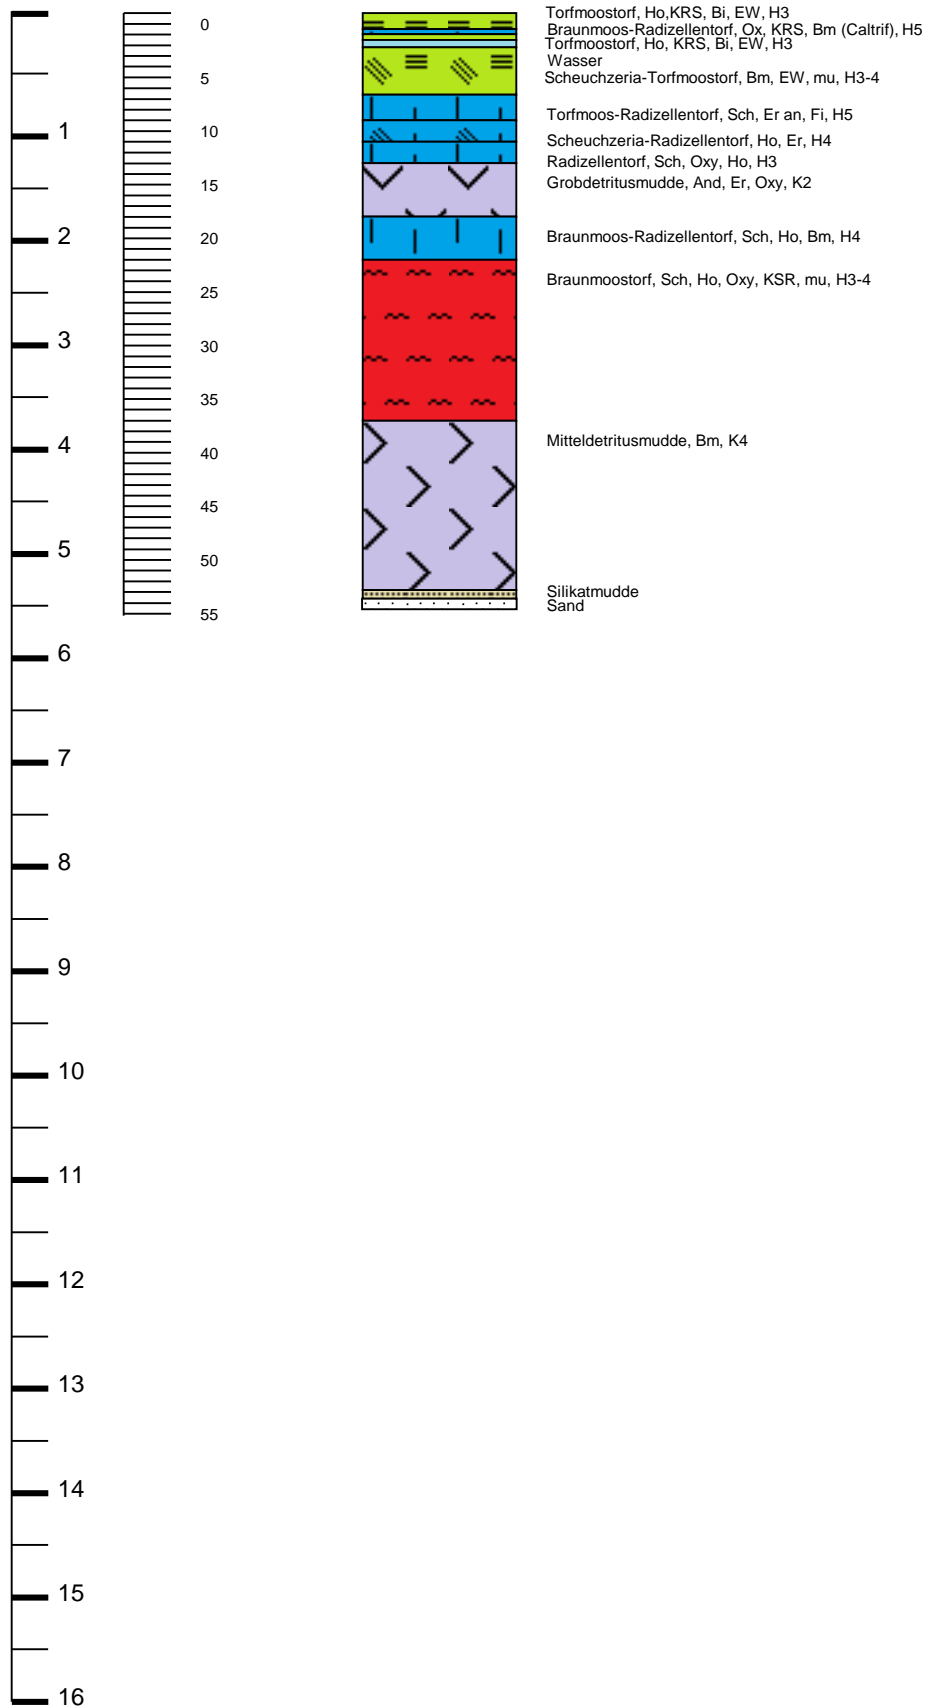

# M 180

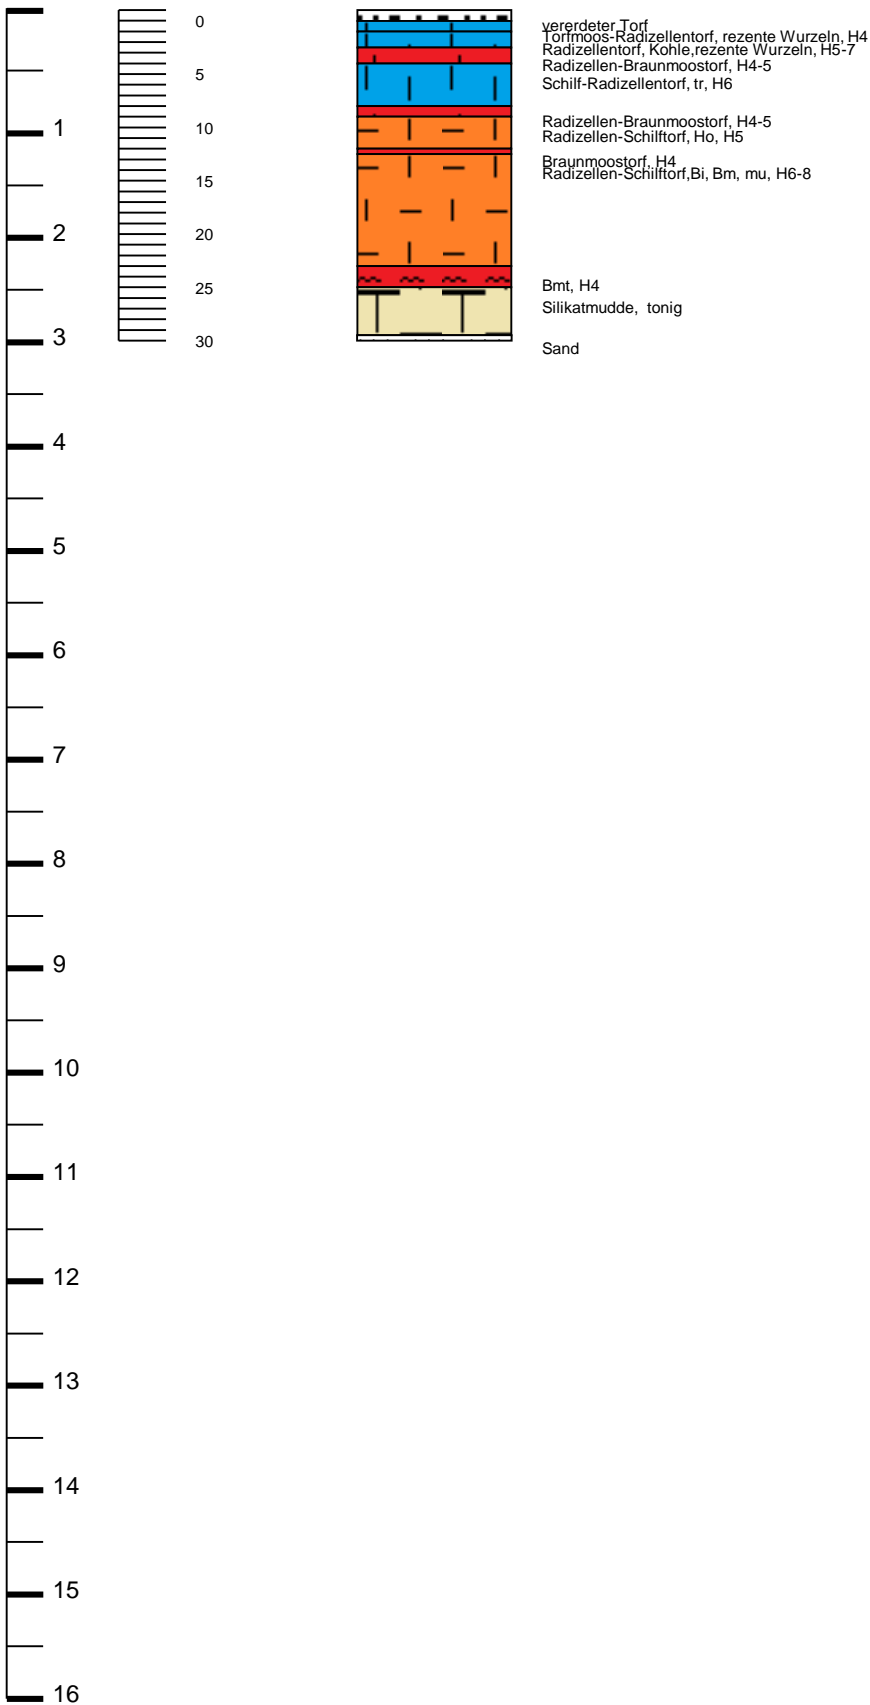

# M 181

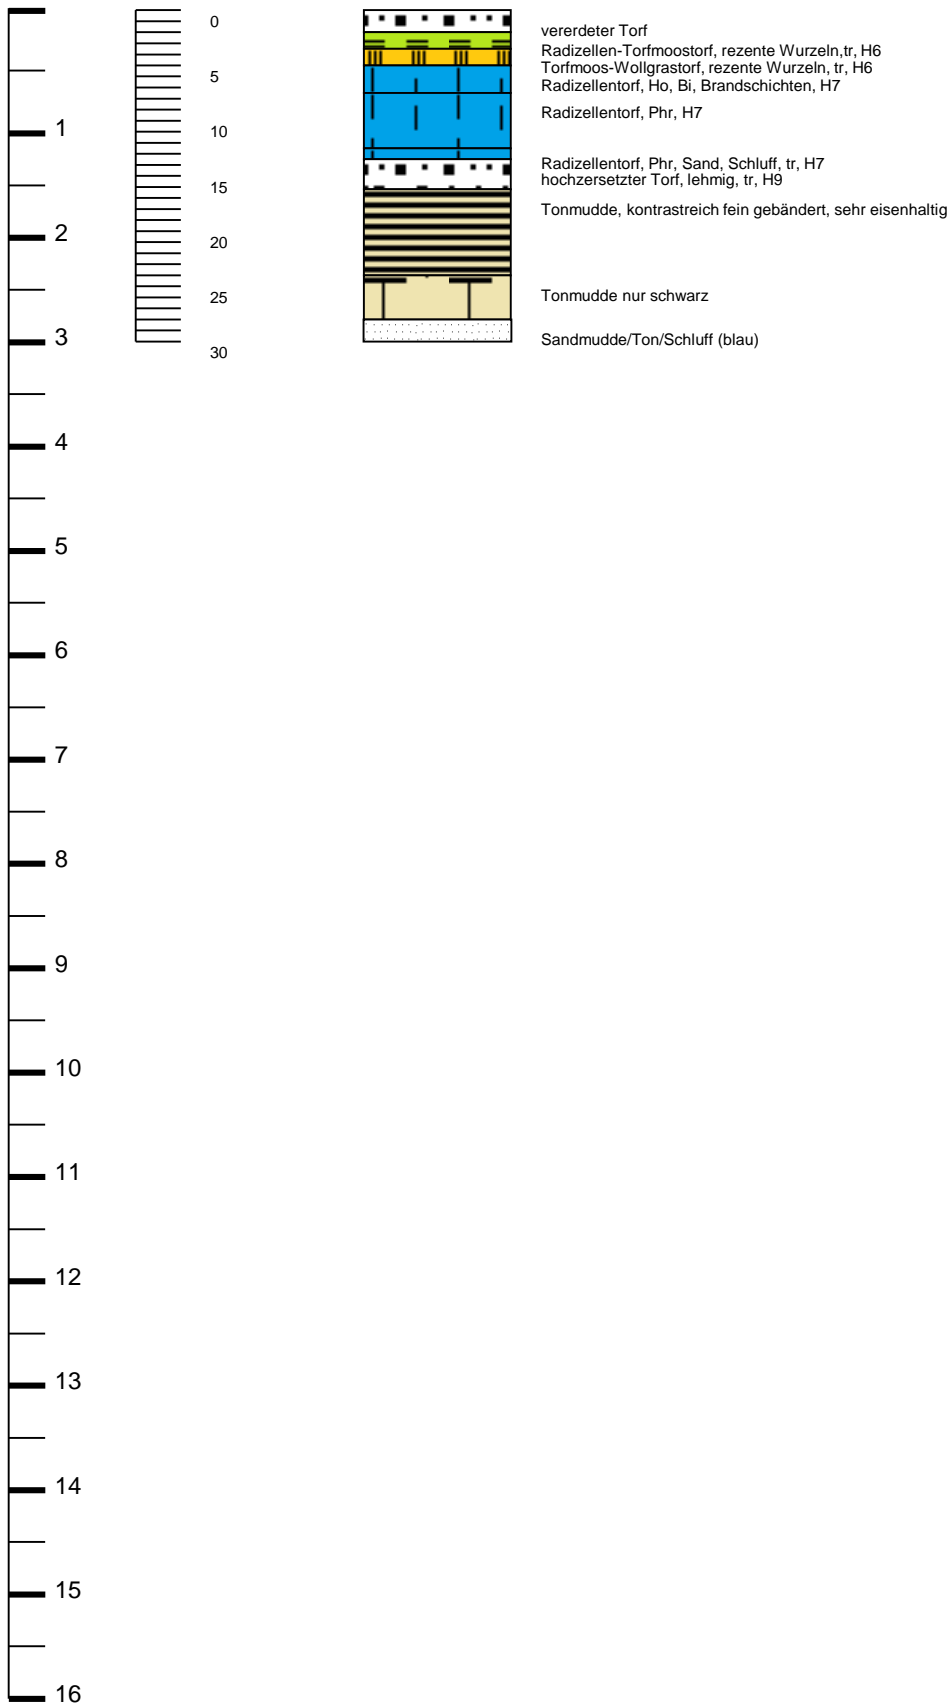

# M 287

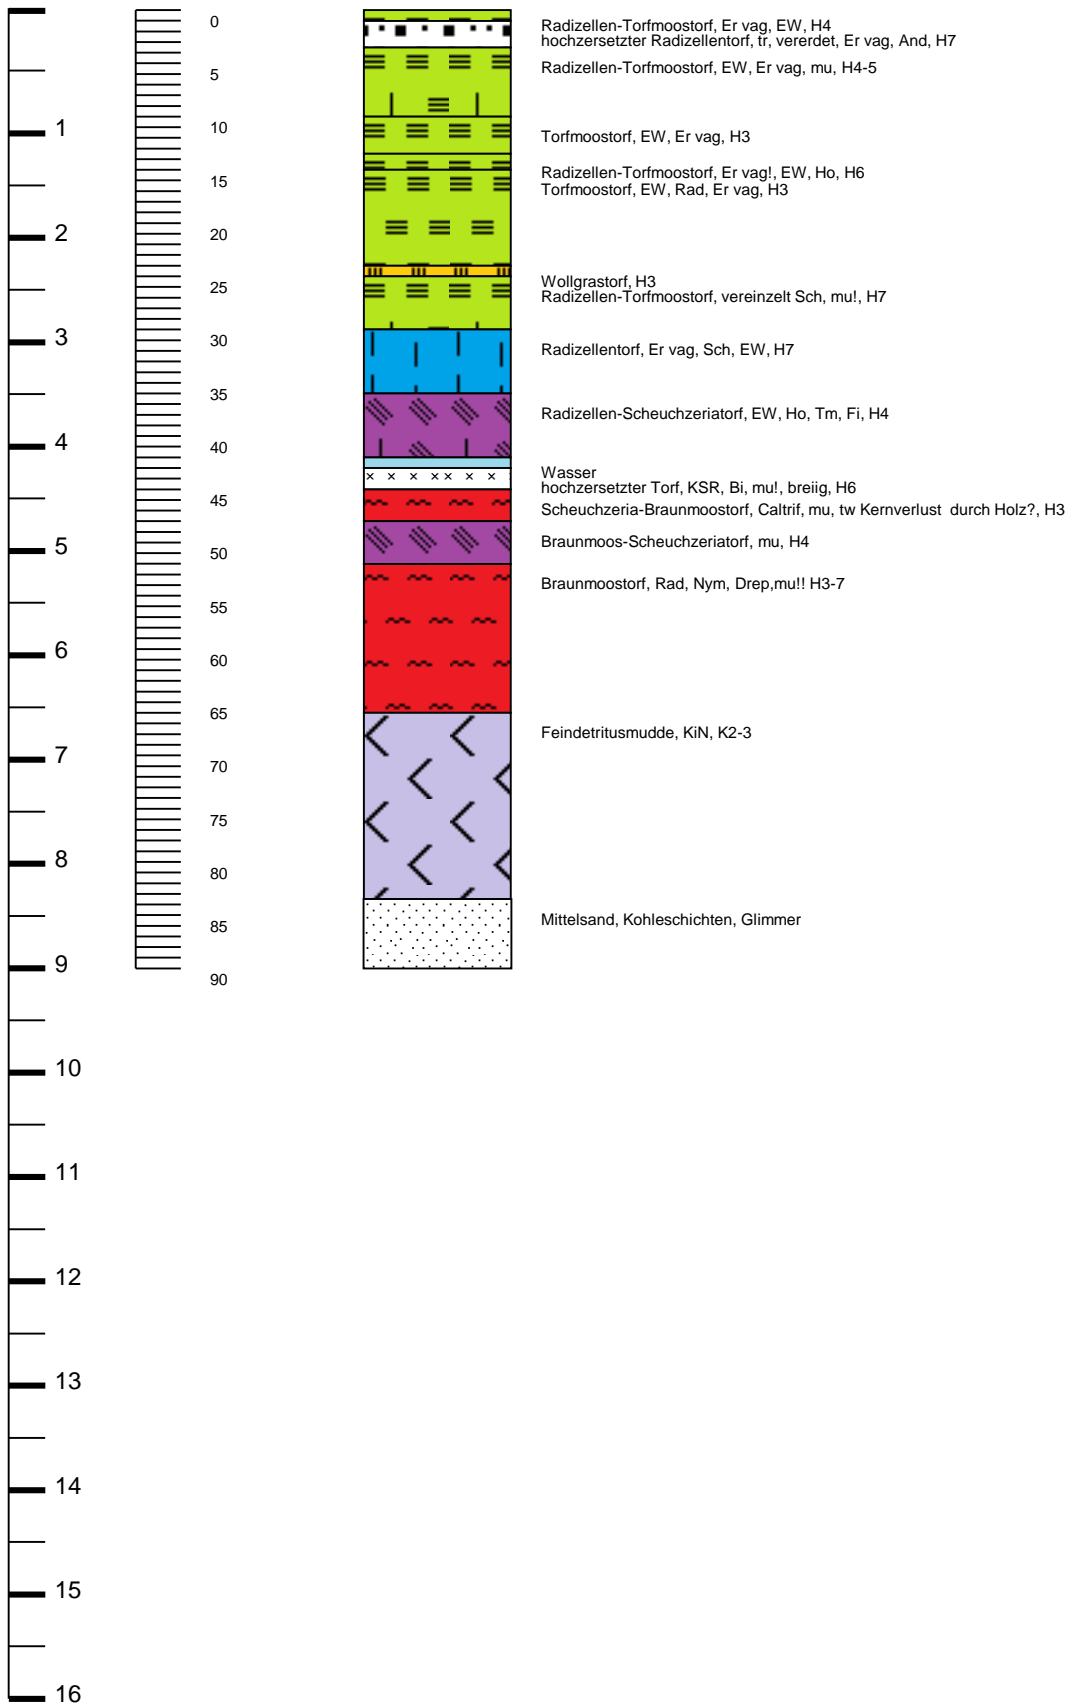

# M 294

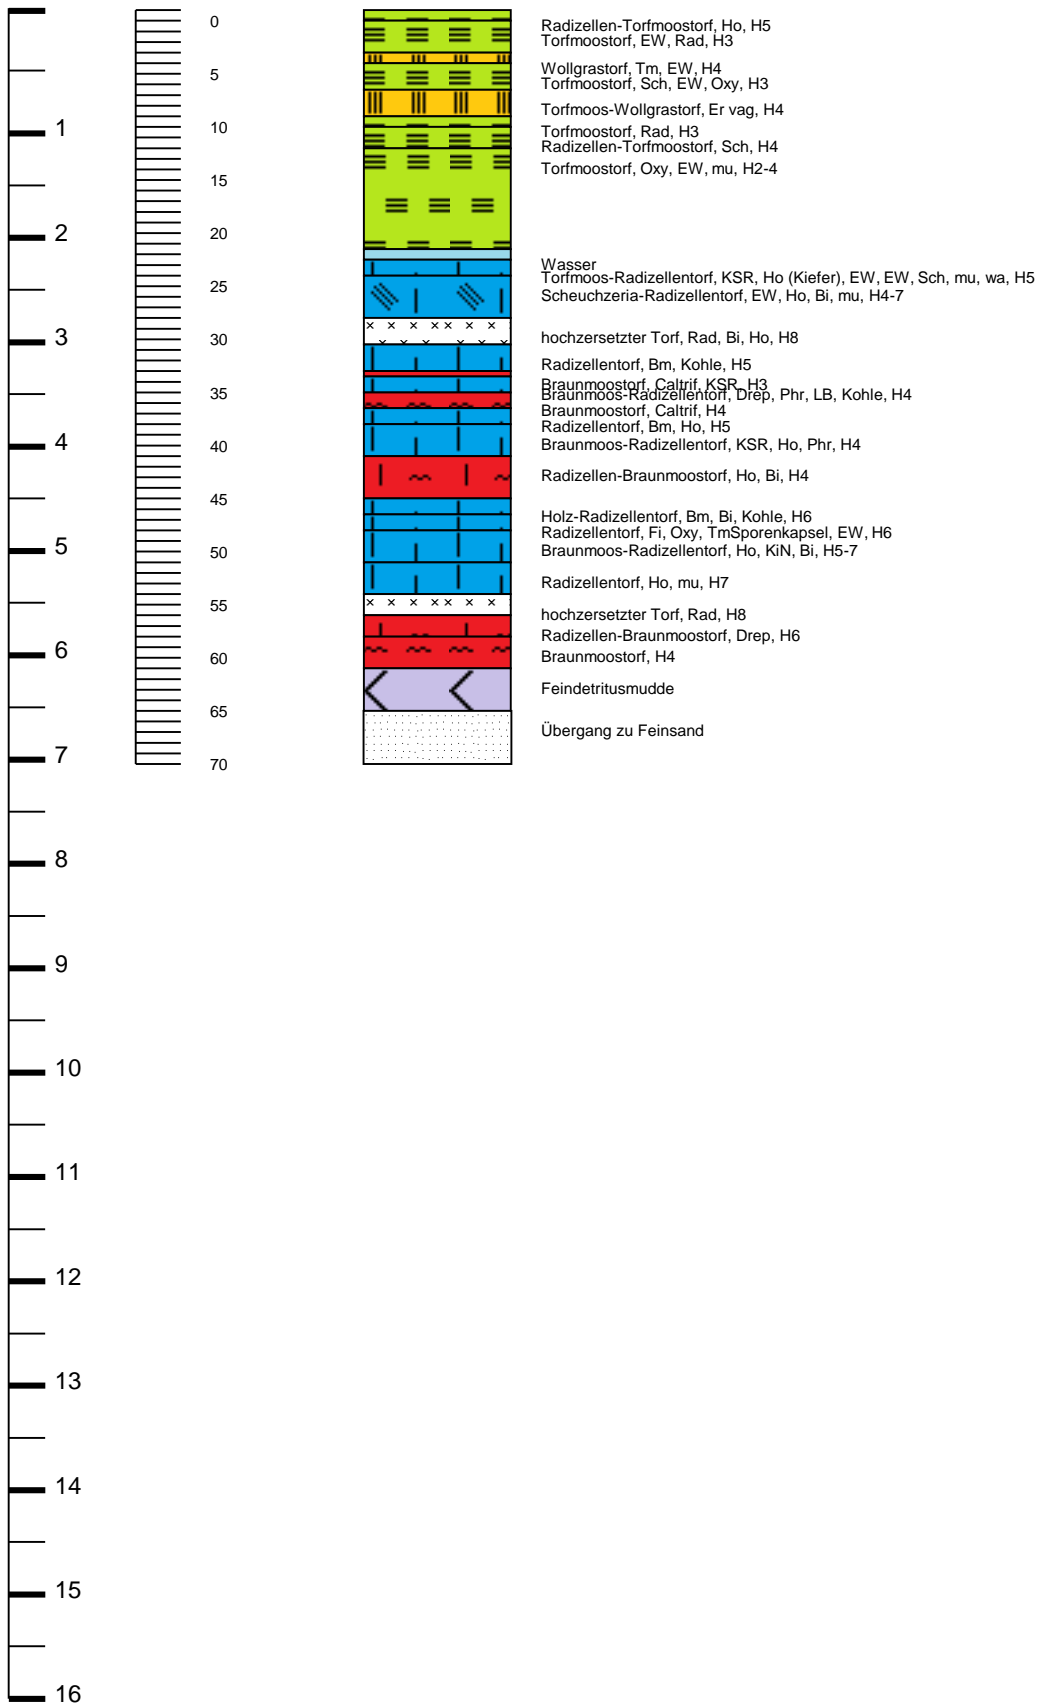

# M 296

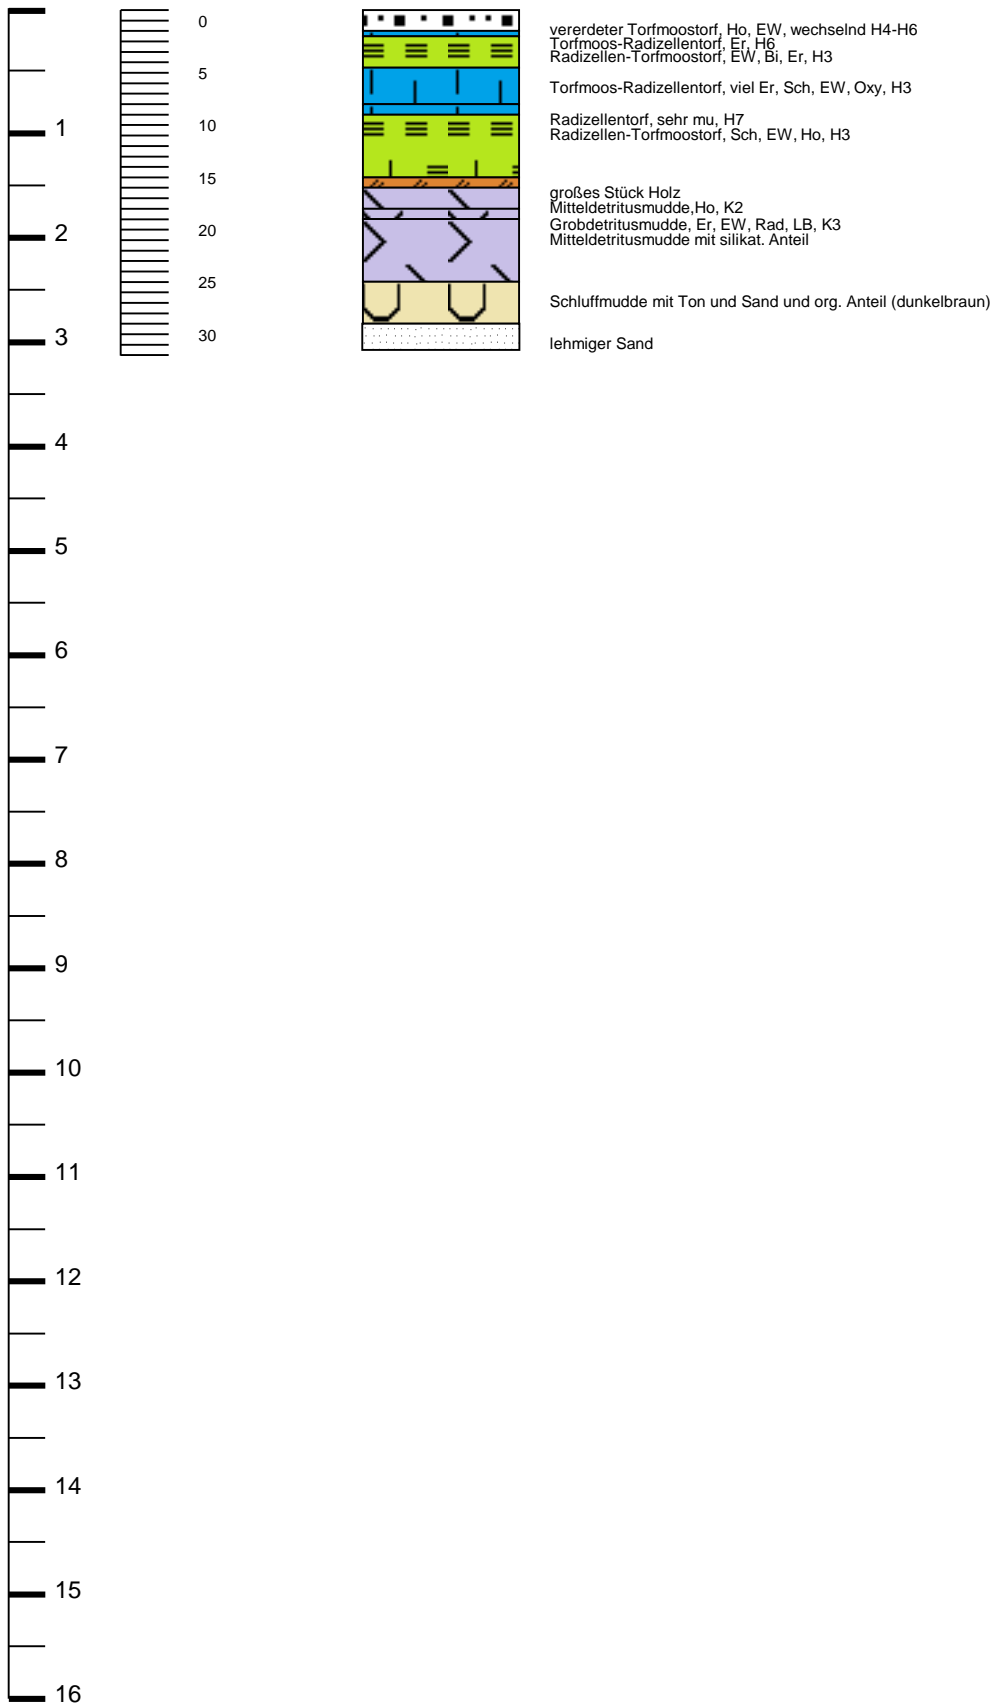

# M 349

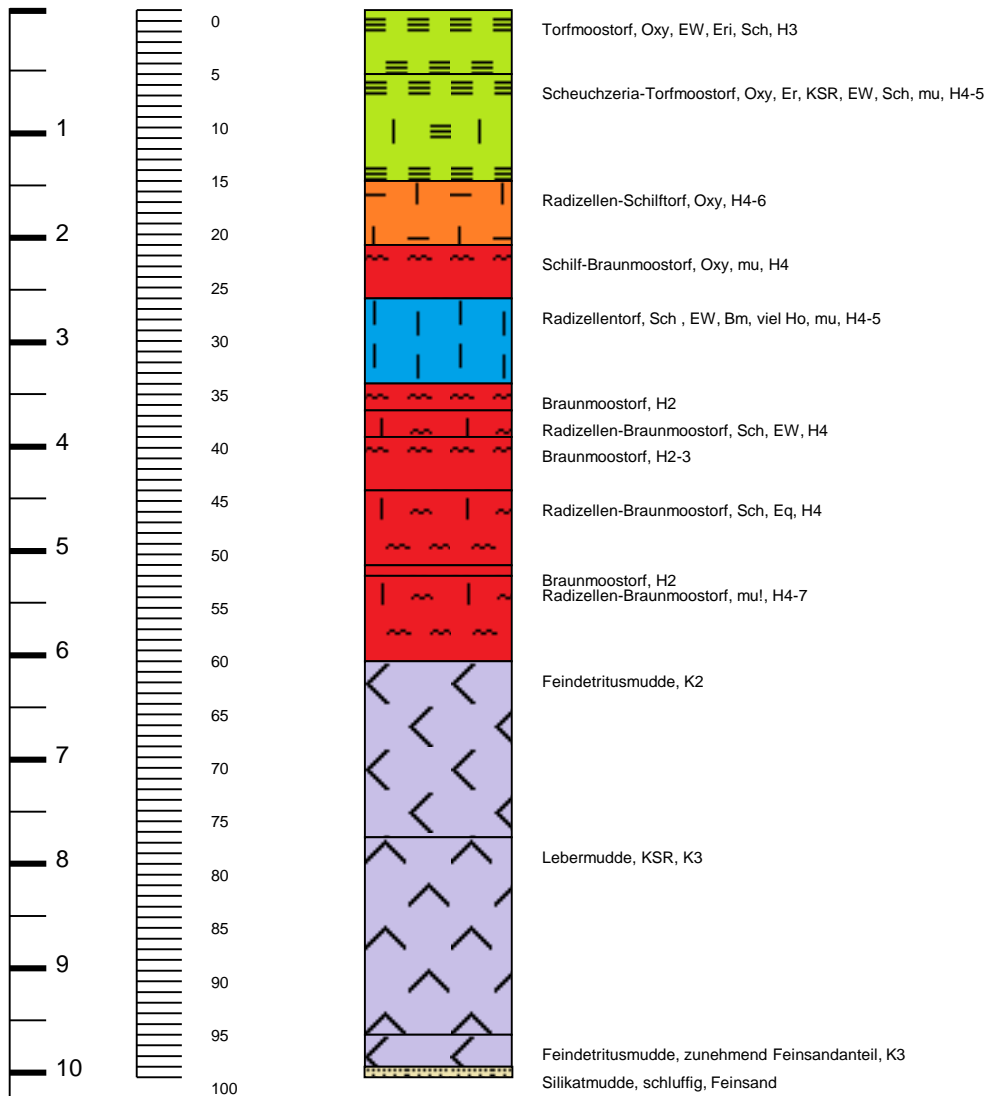

# M 350

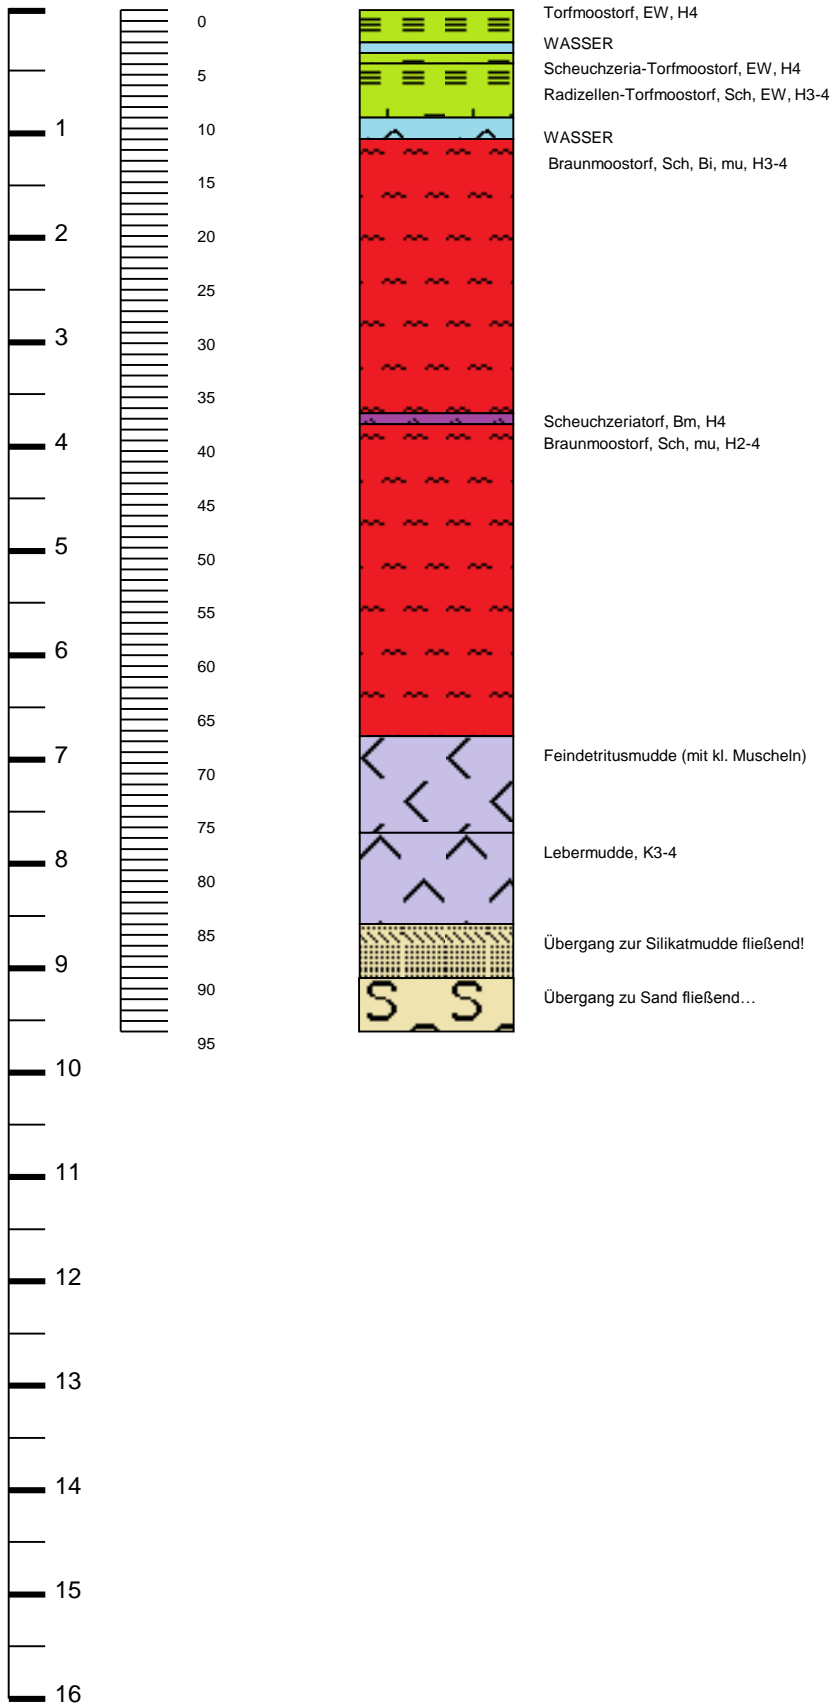

# M 351

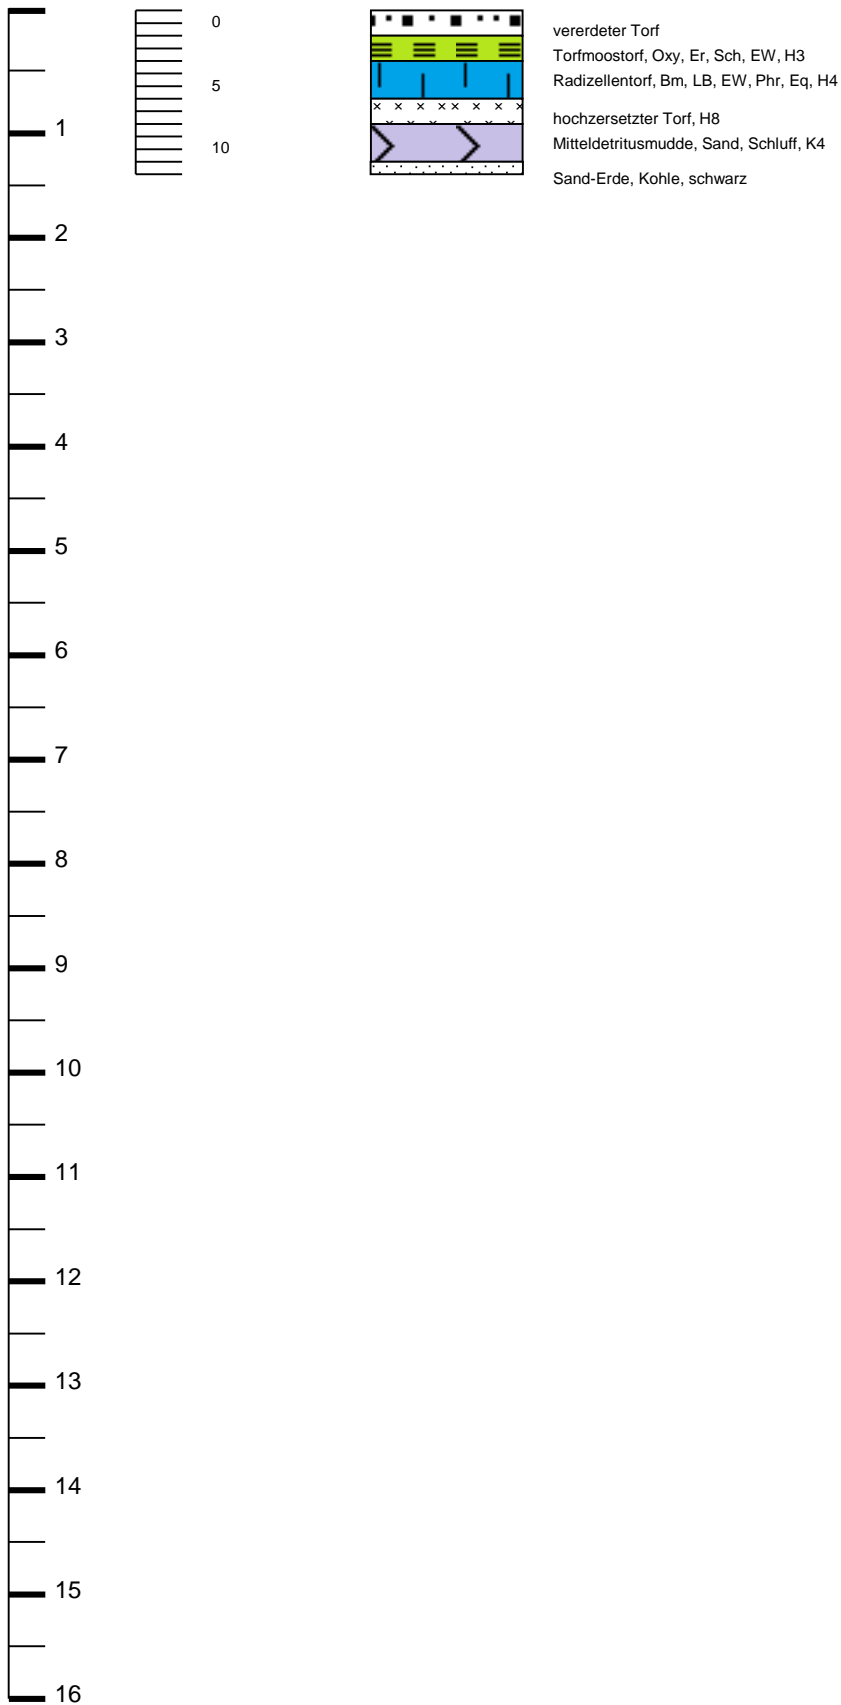

# M 352

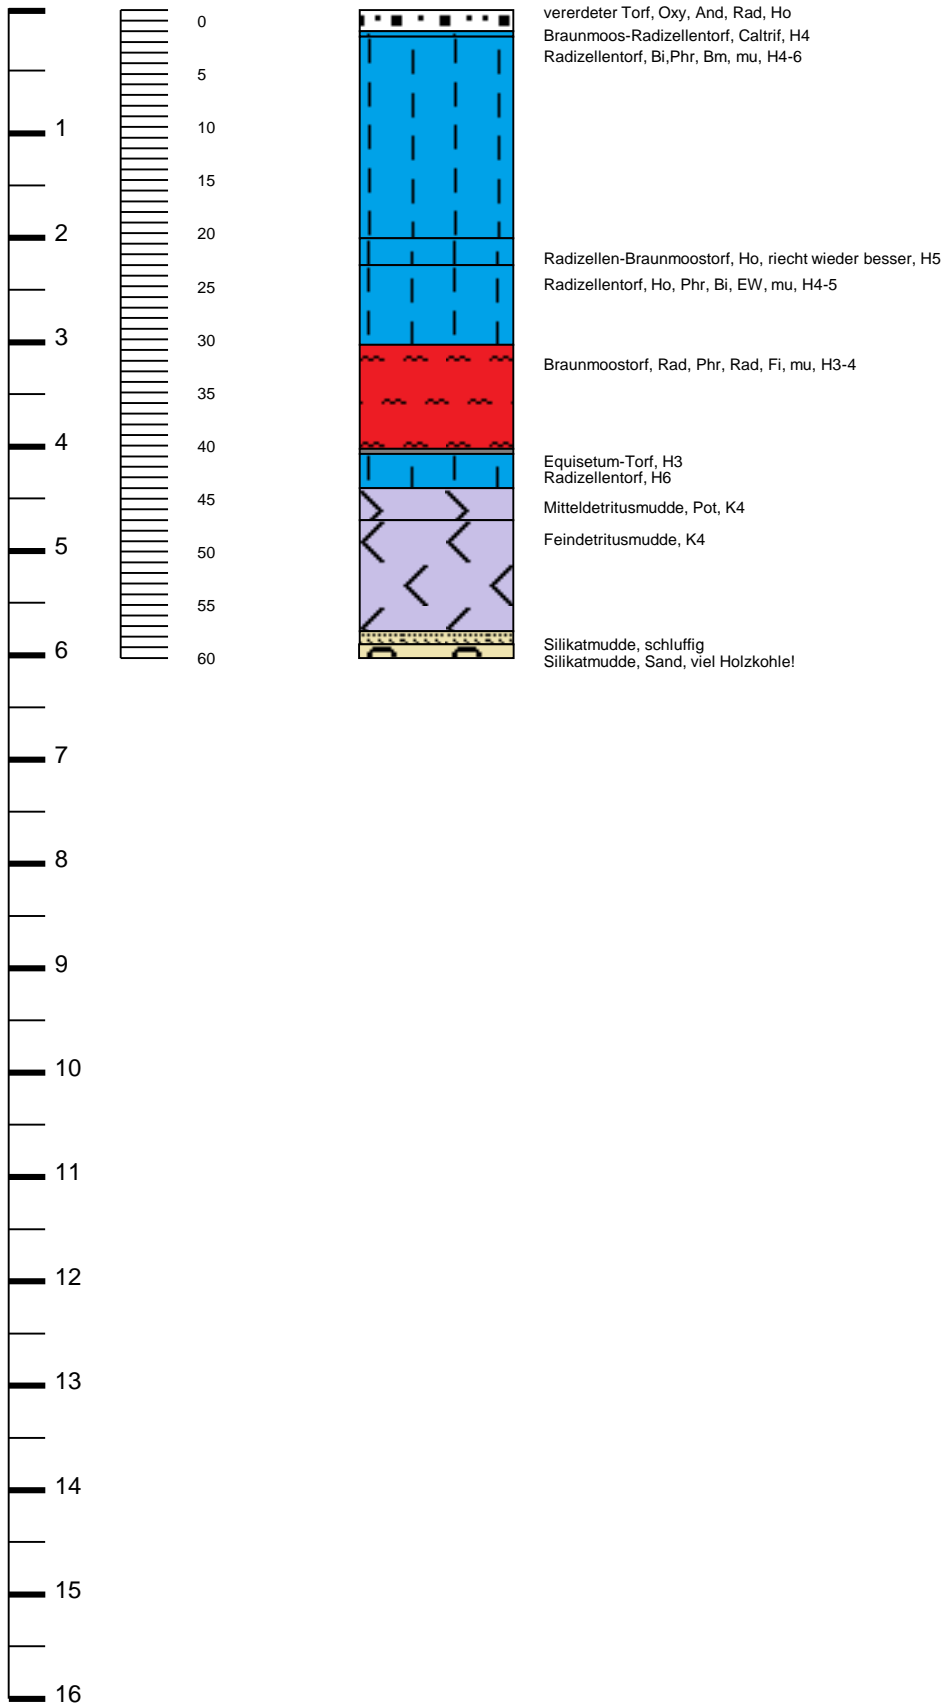

# M 353

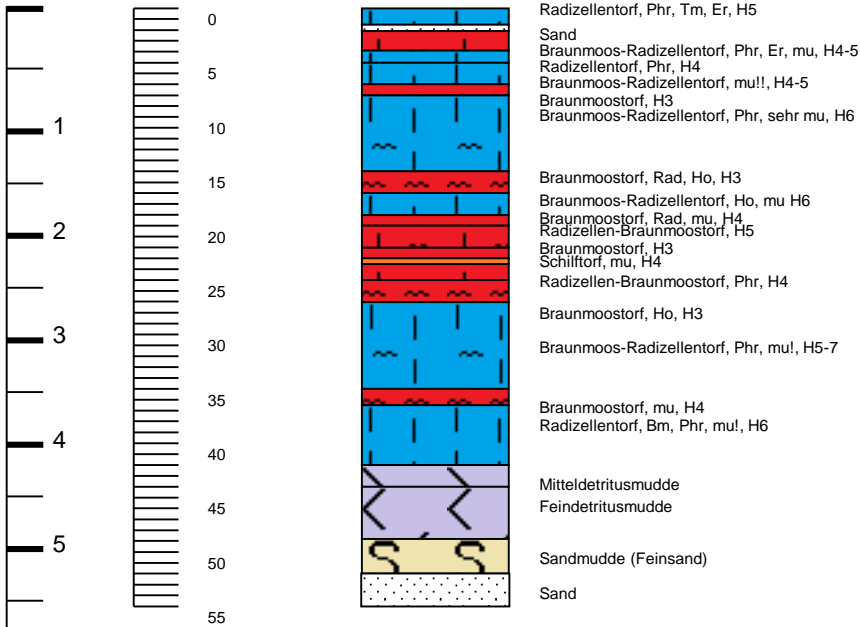

# M 409

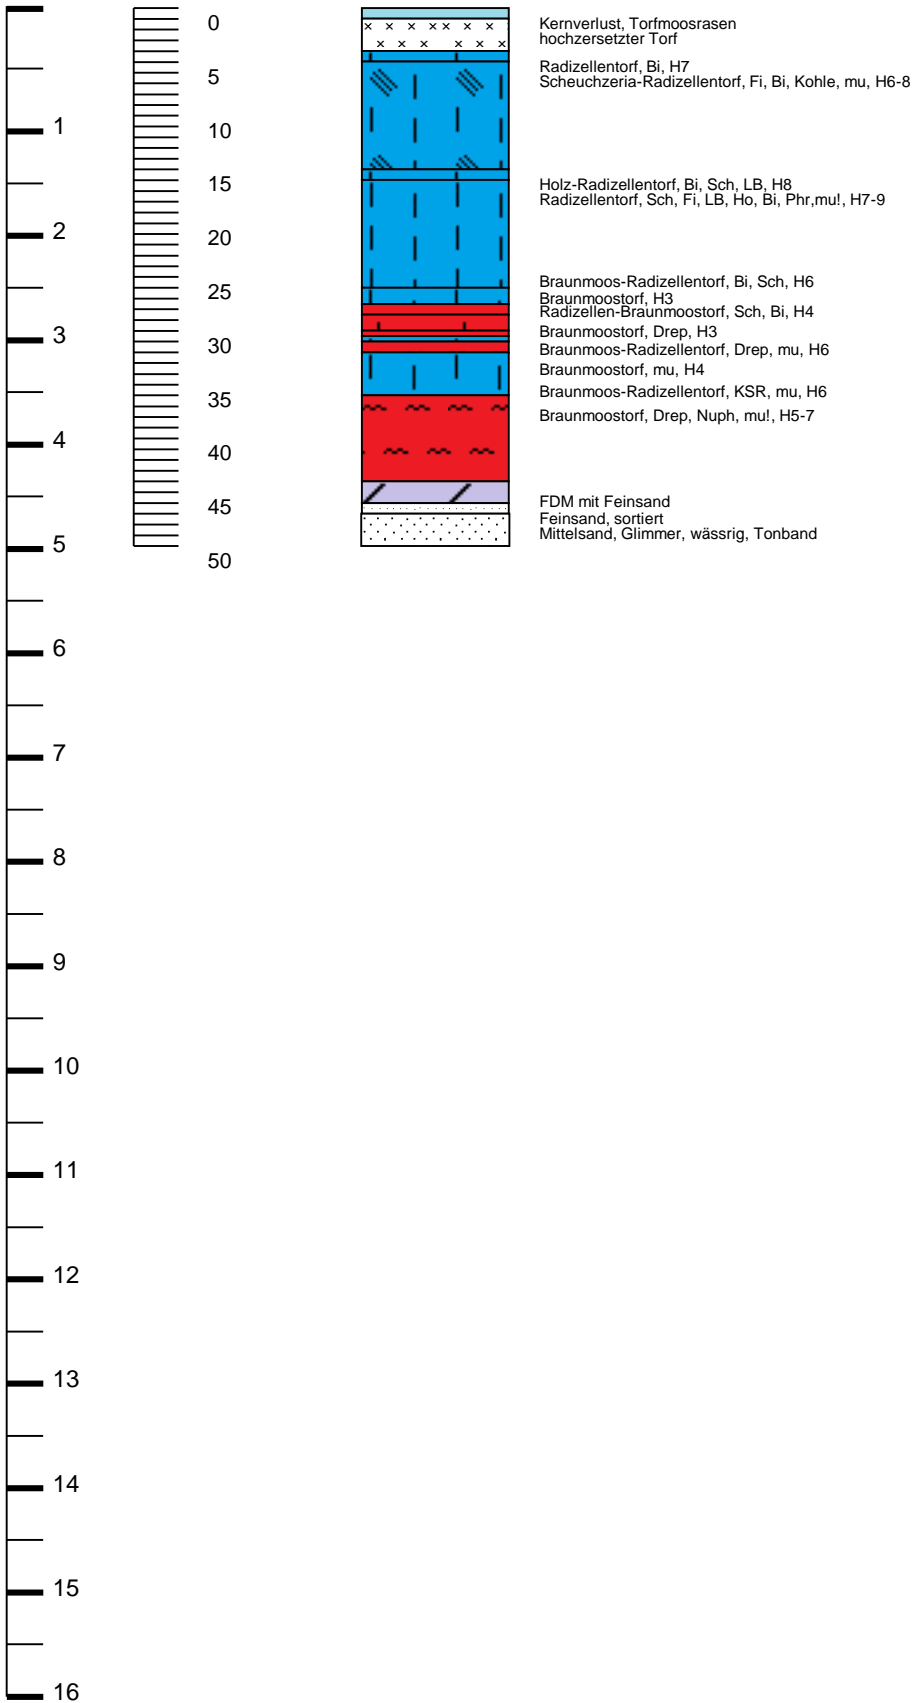

# M 417

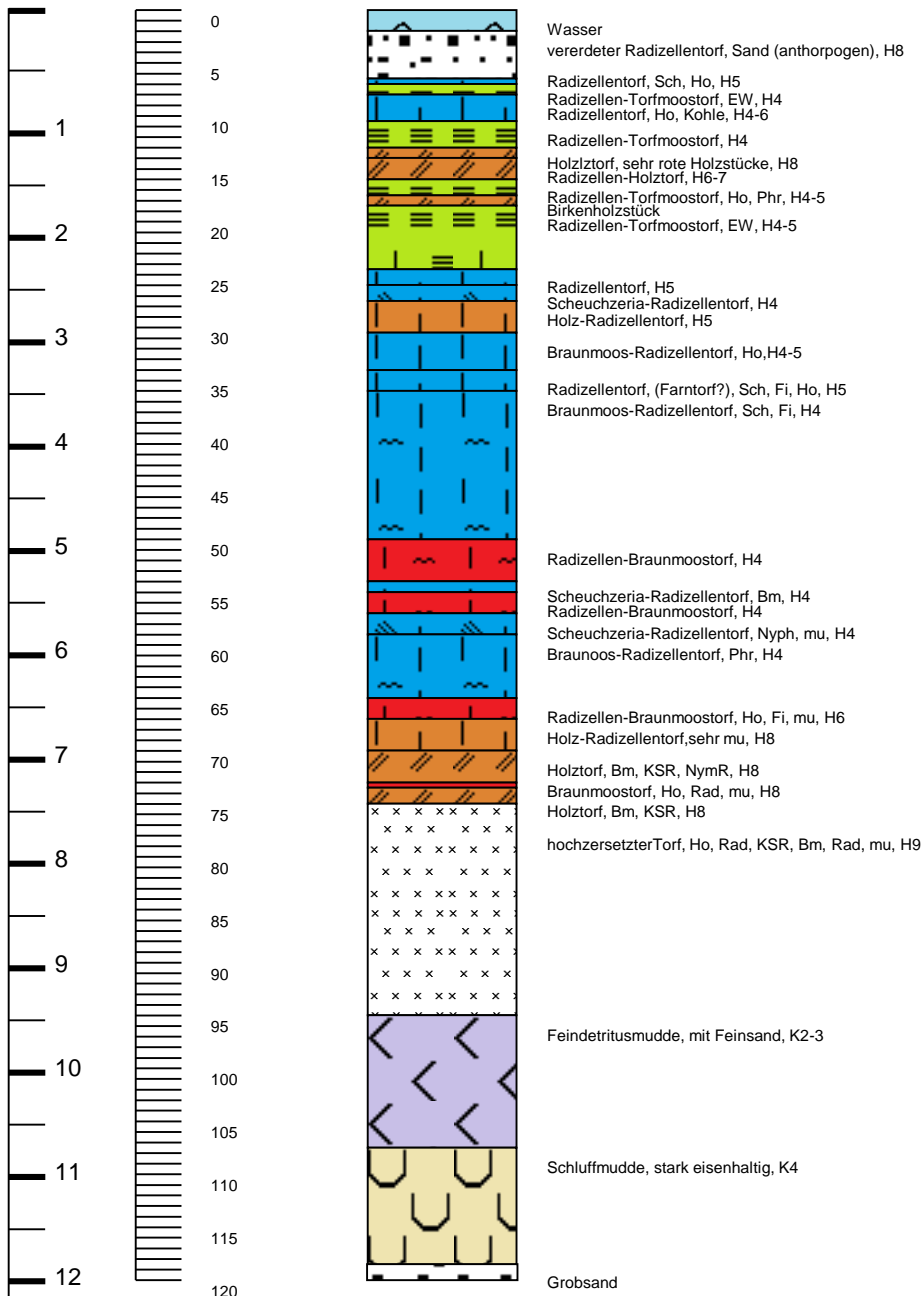

# M 420

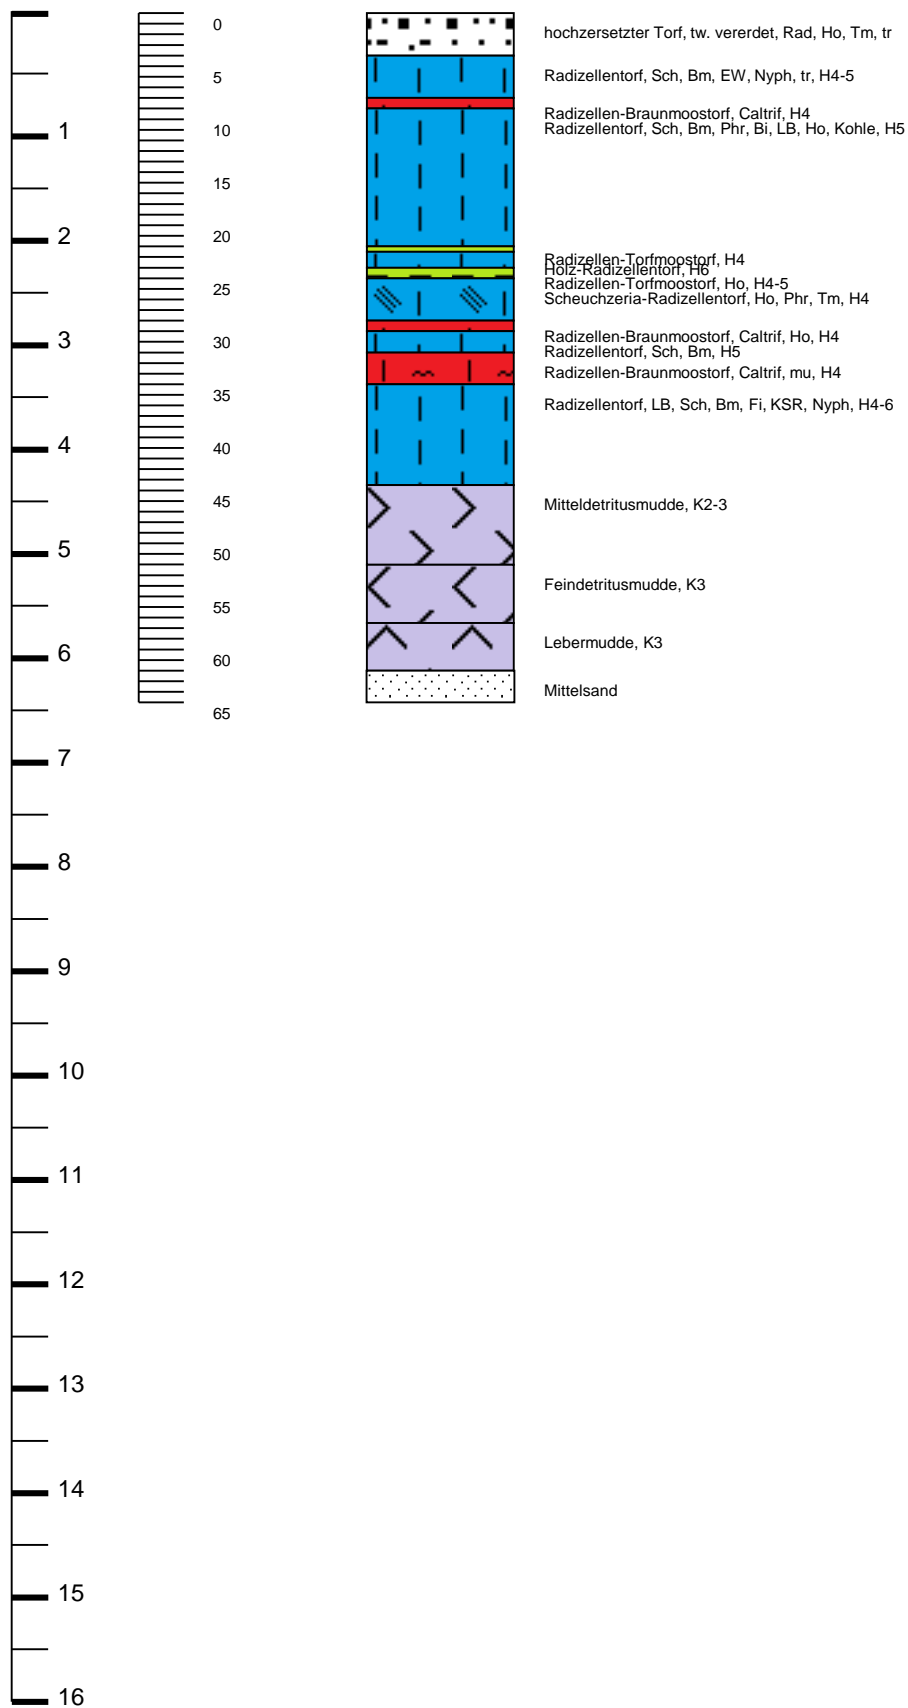

# M 423

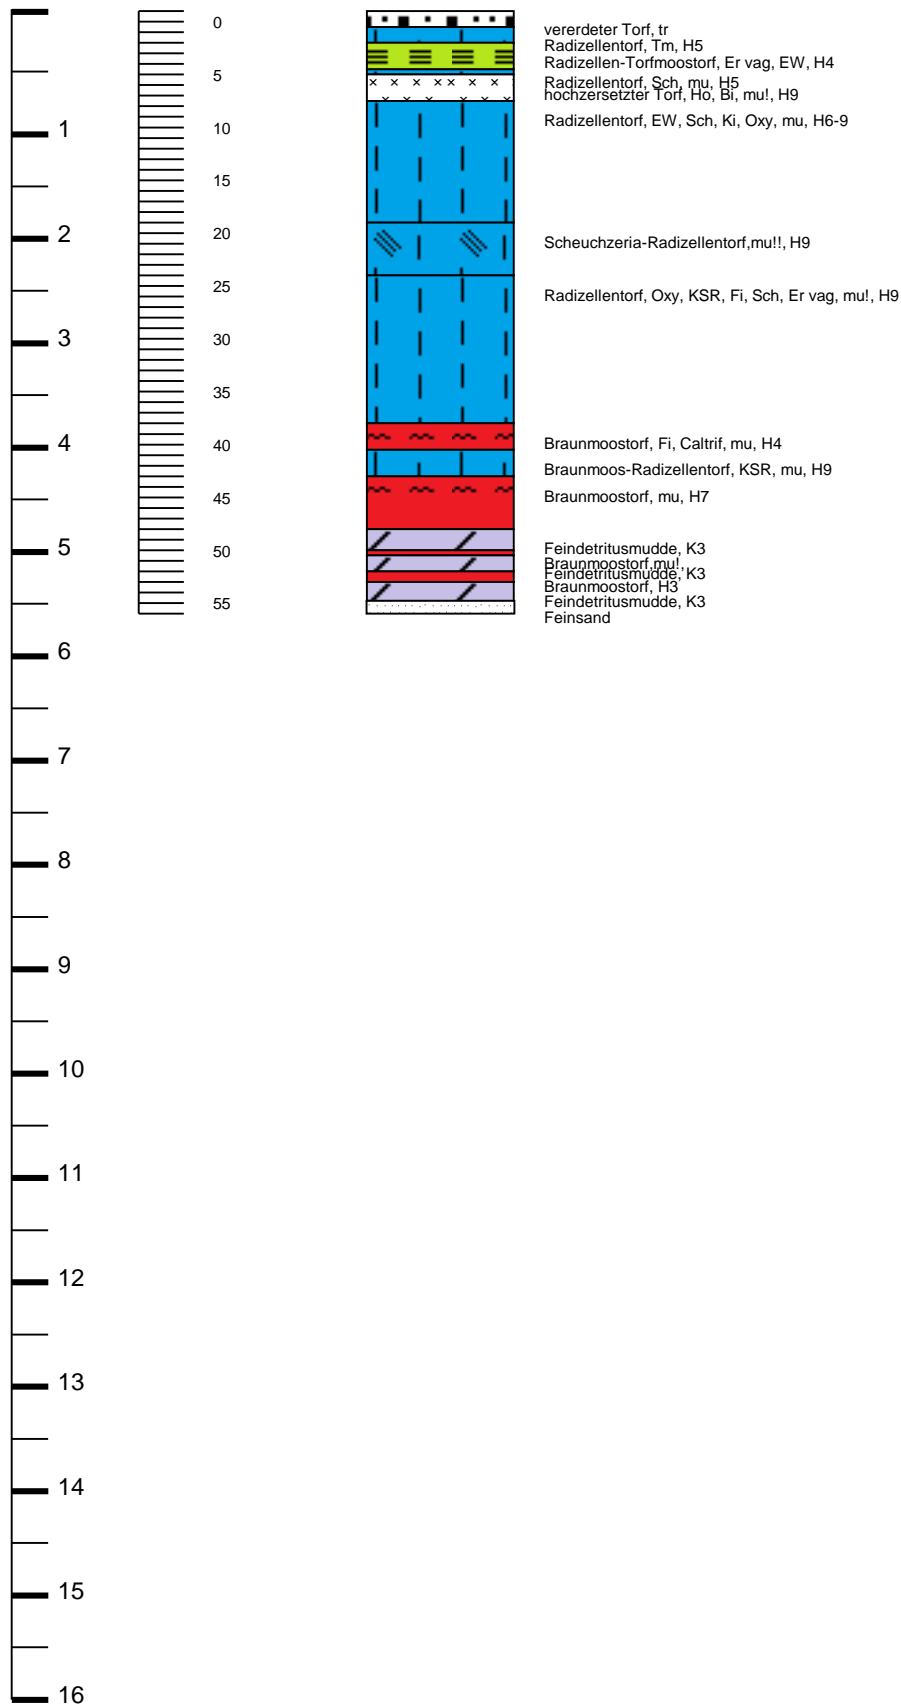

# M 426

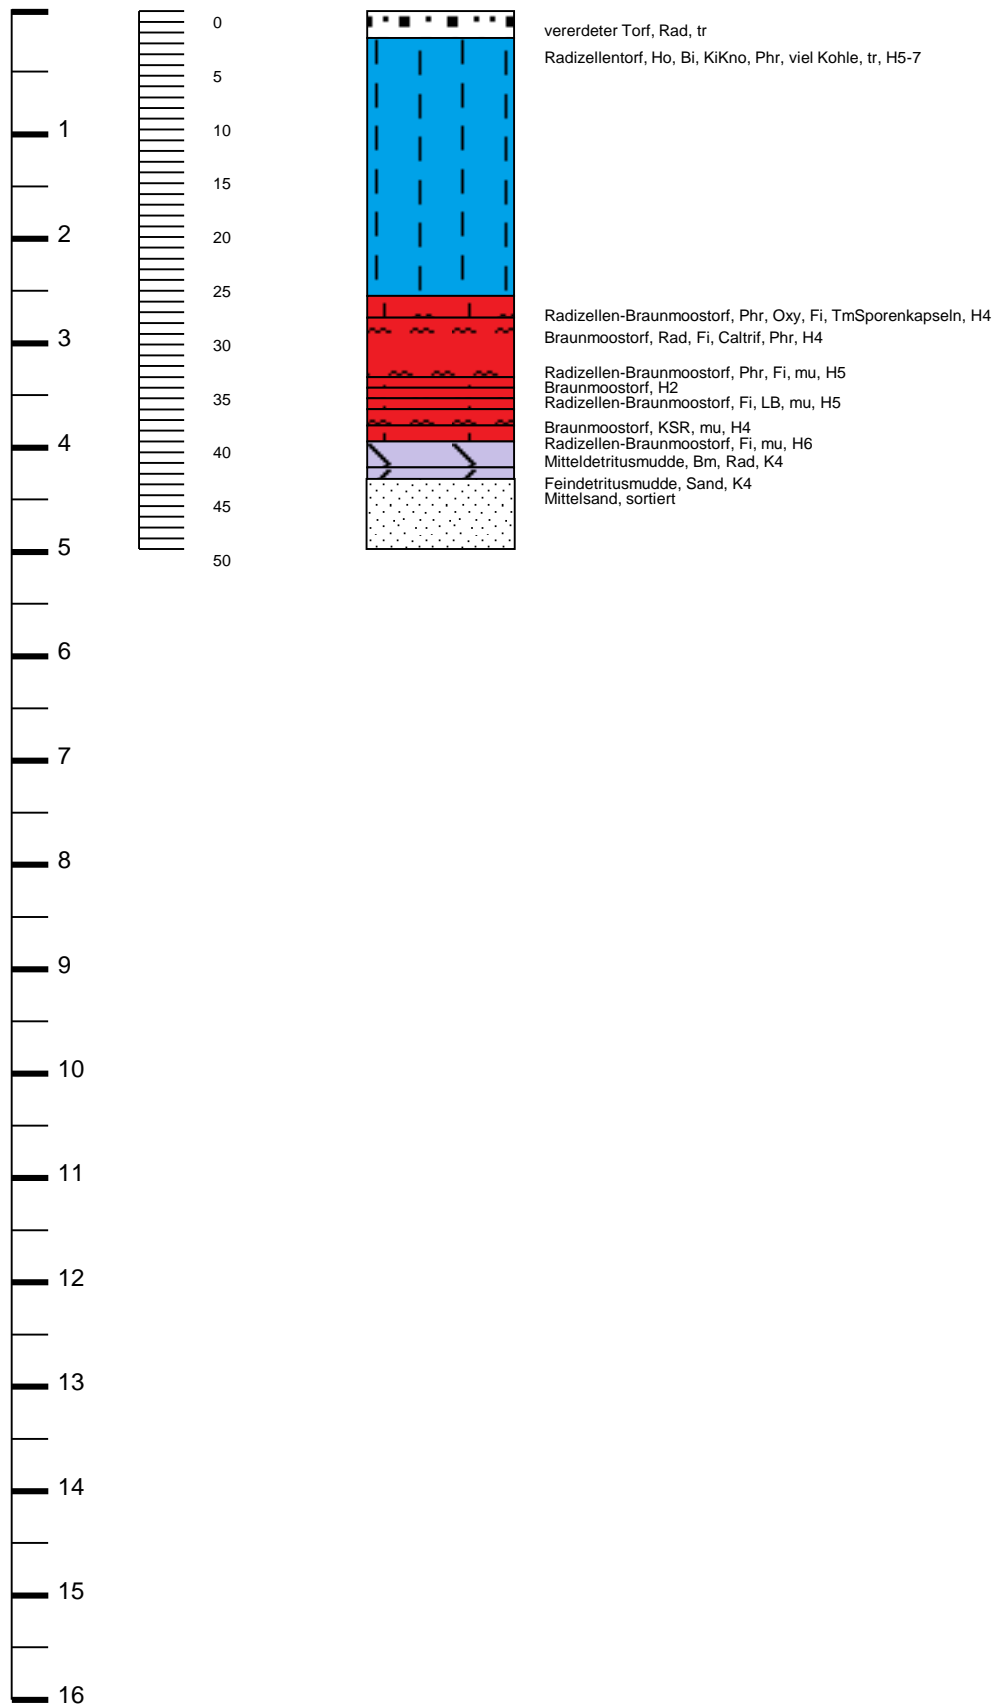

# M 430

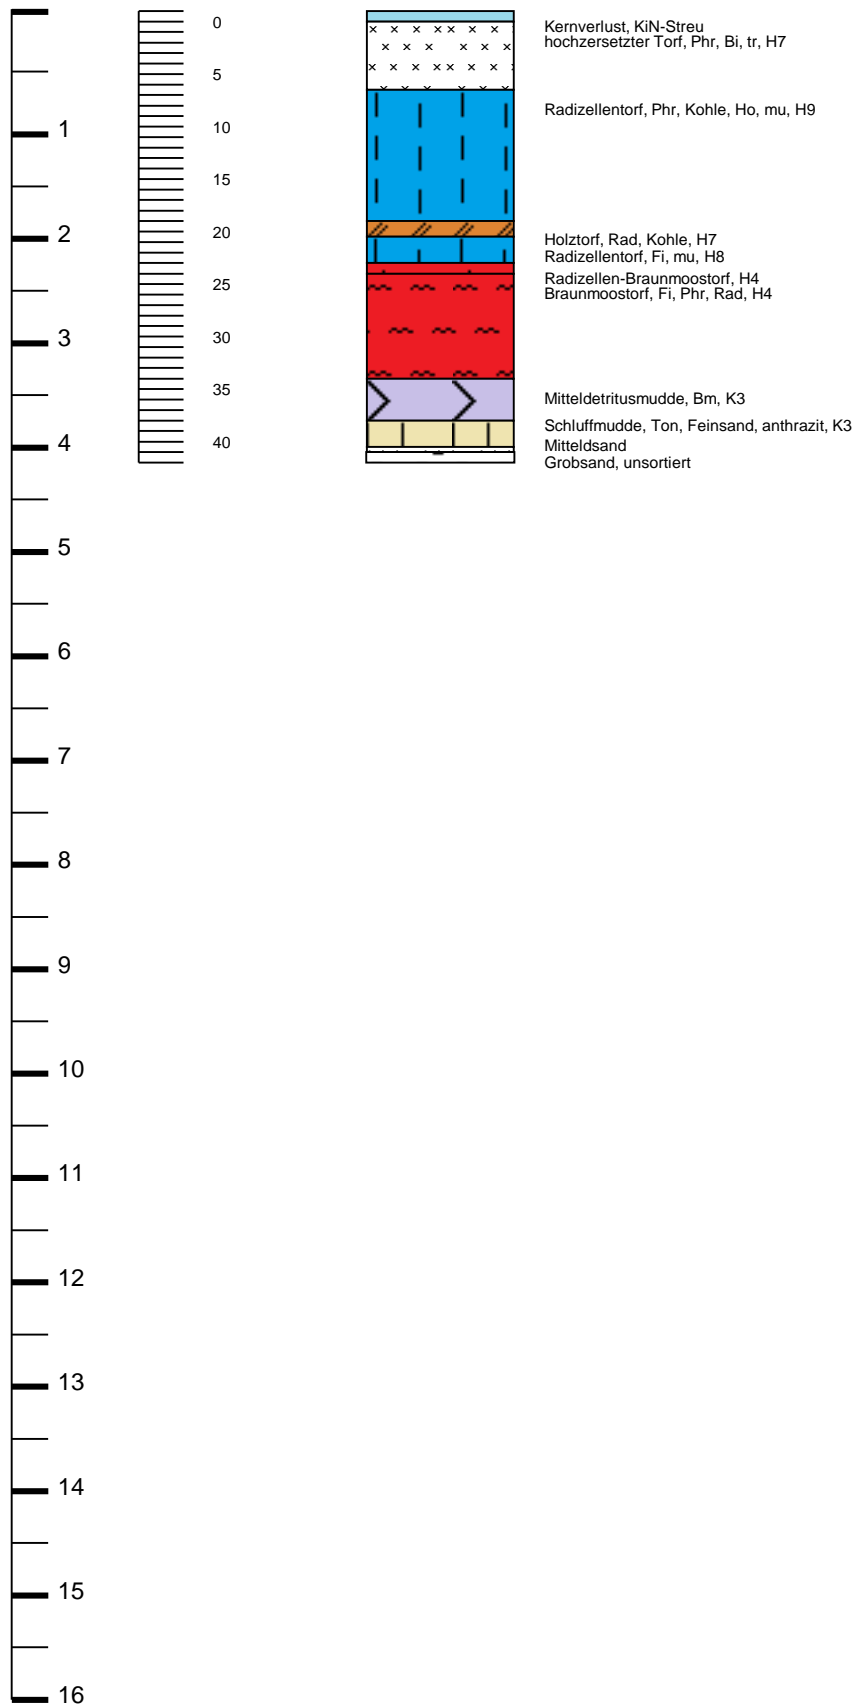

# M 434

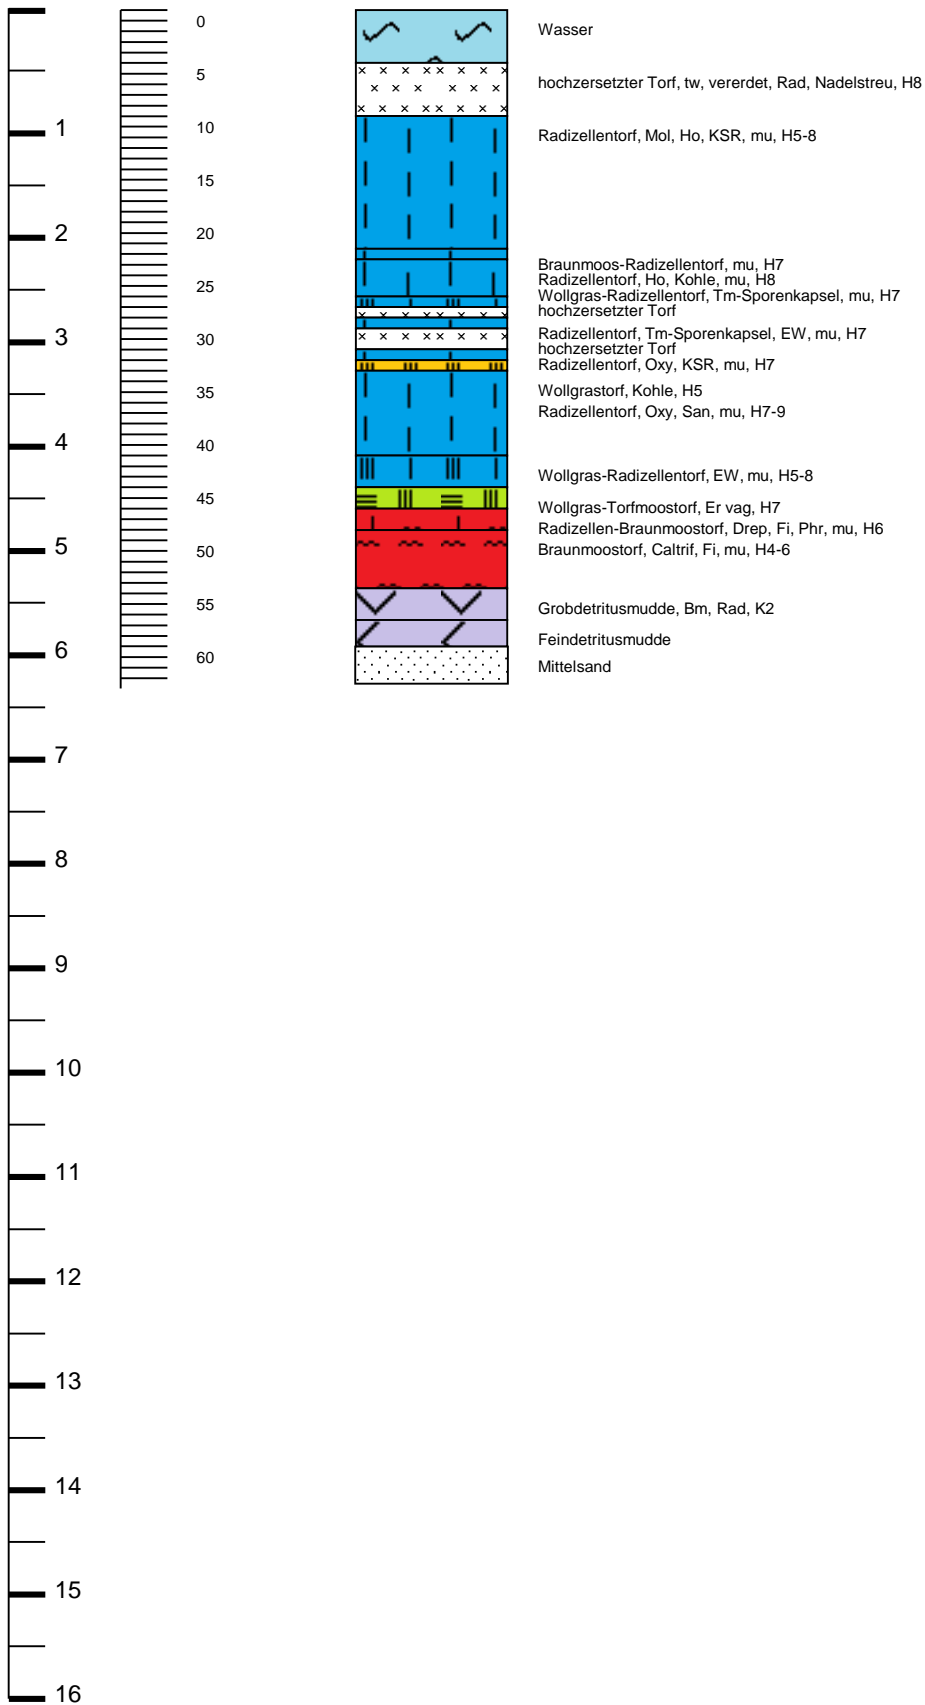

# M 462

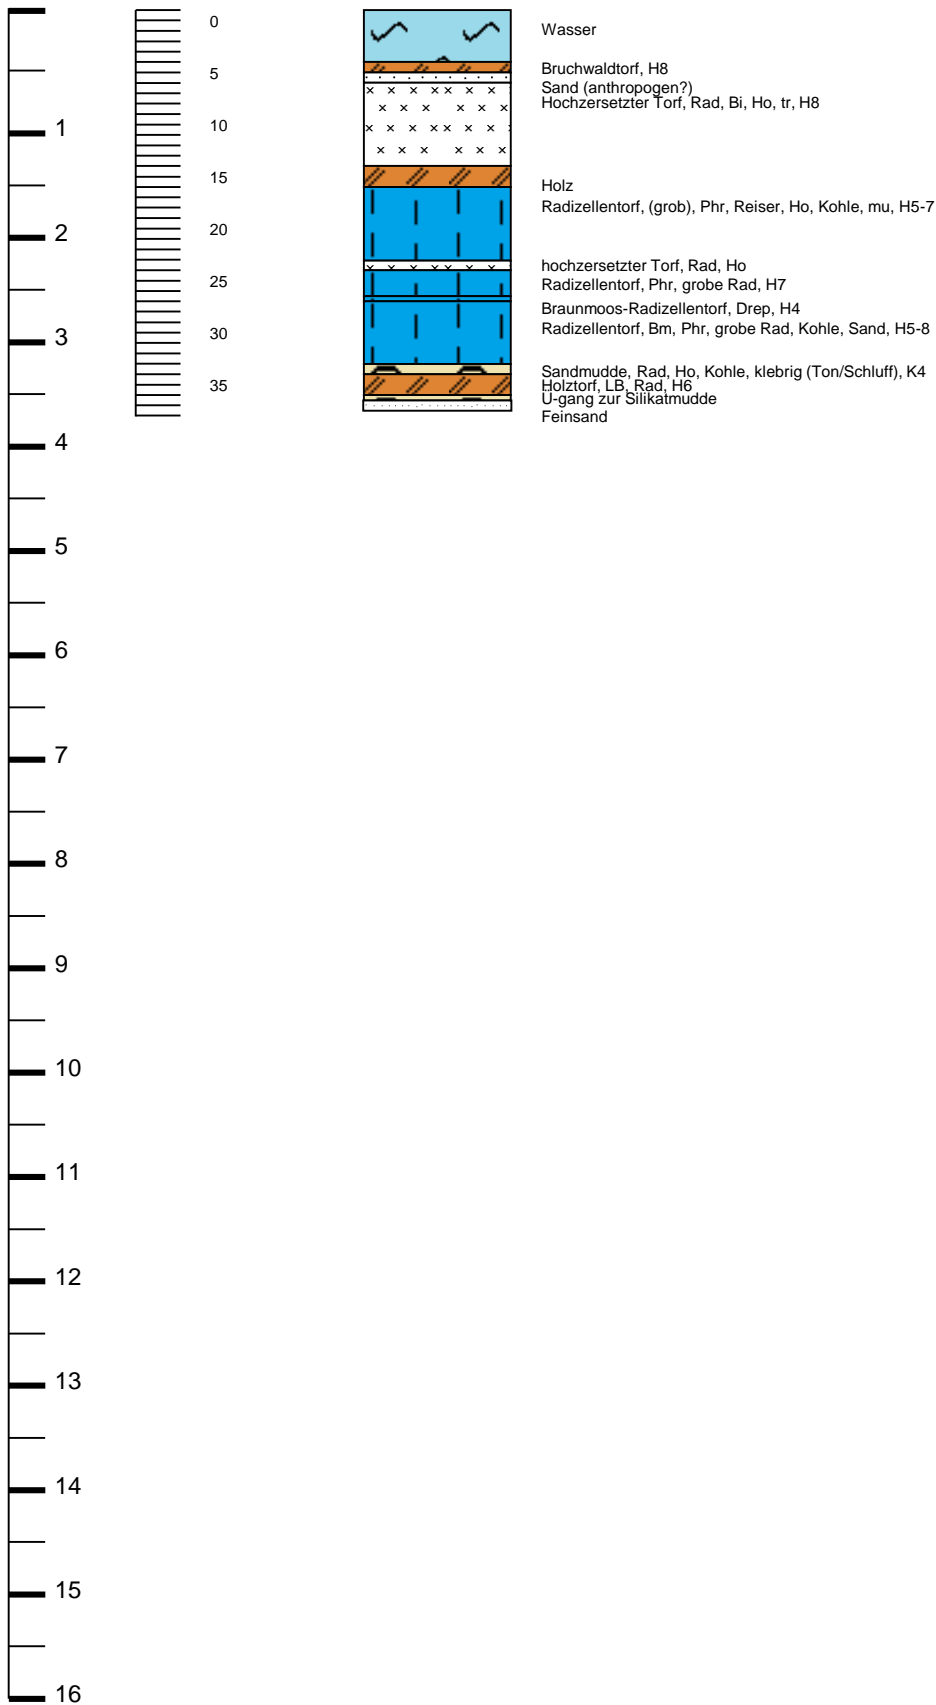

# M 467

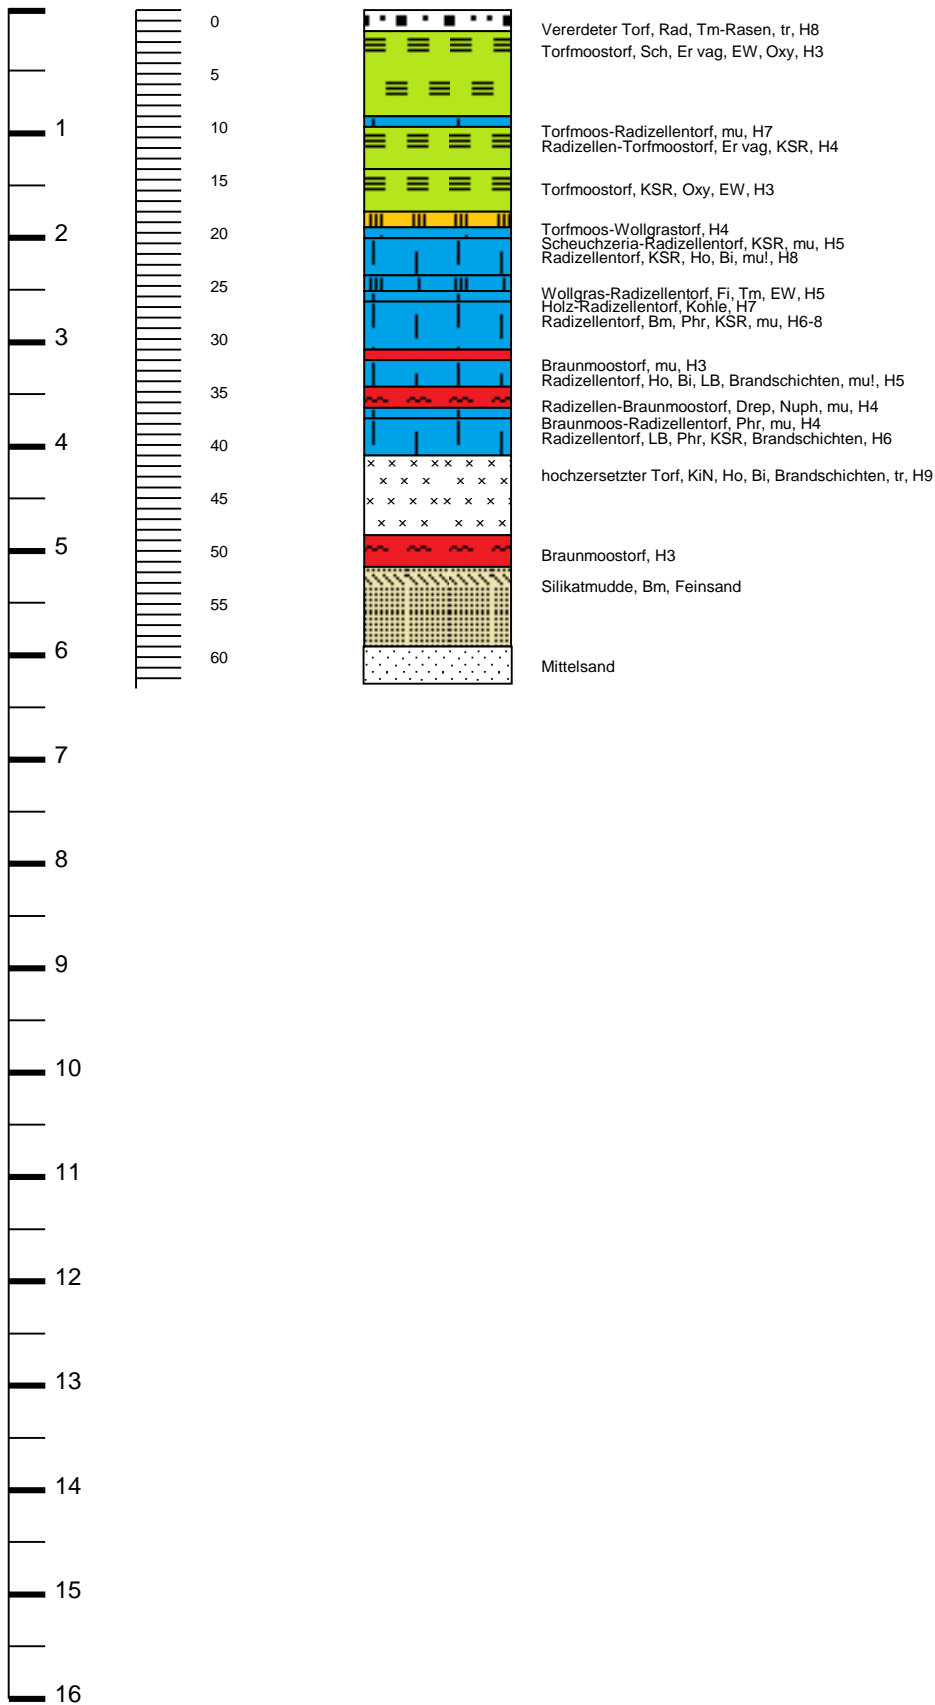

# M 470

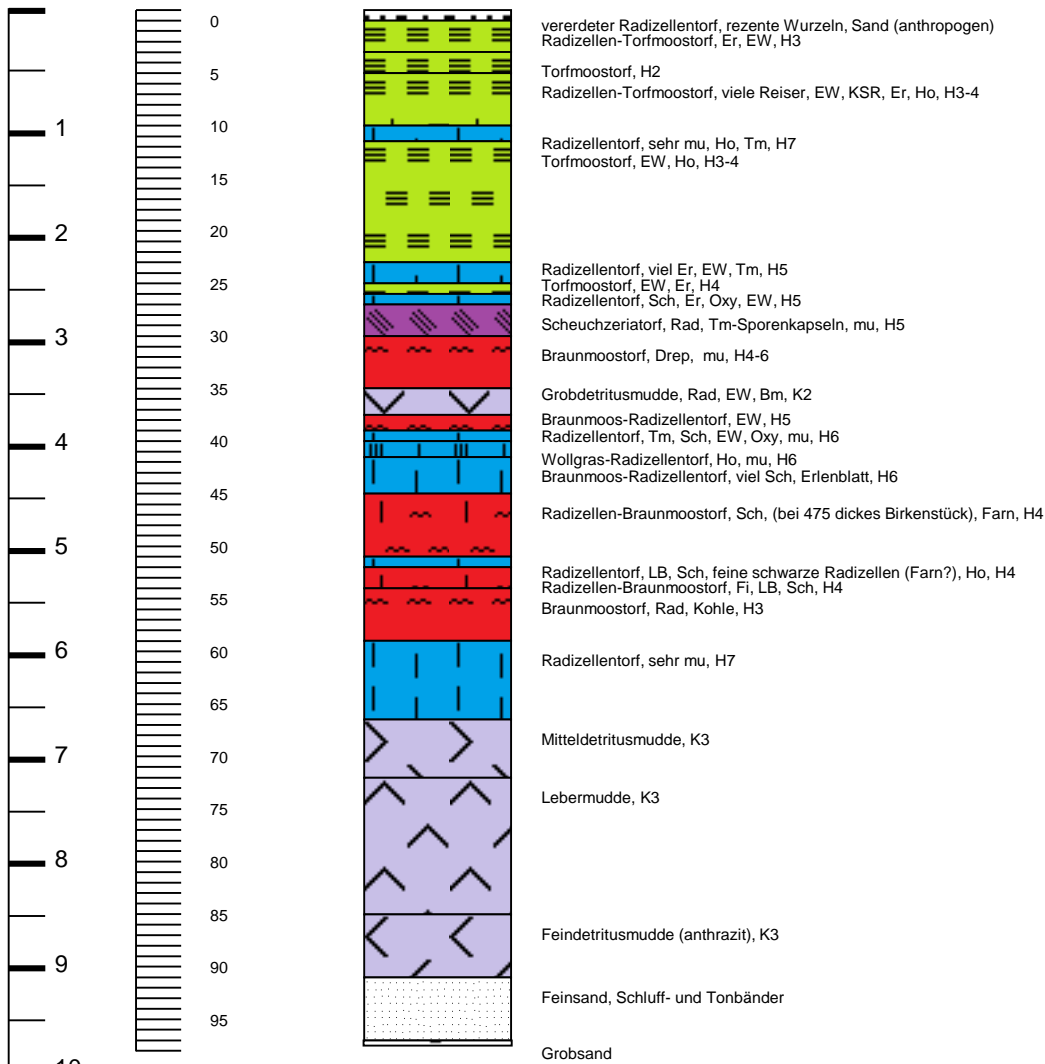

# M 516

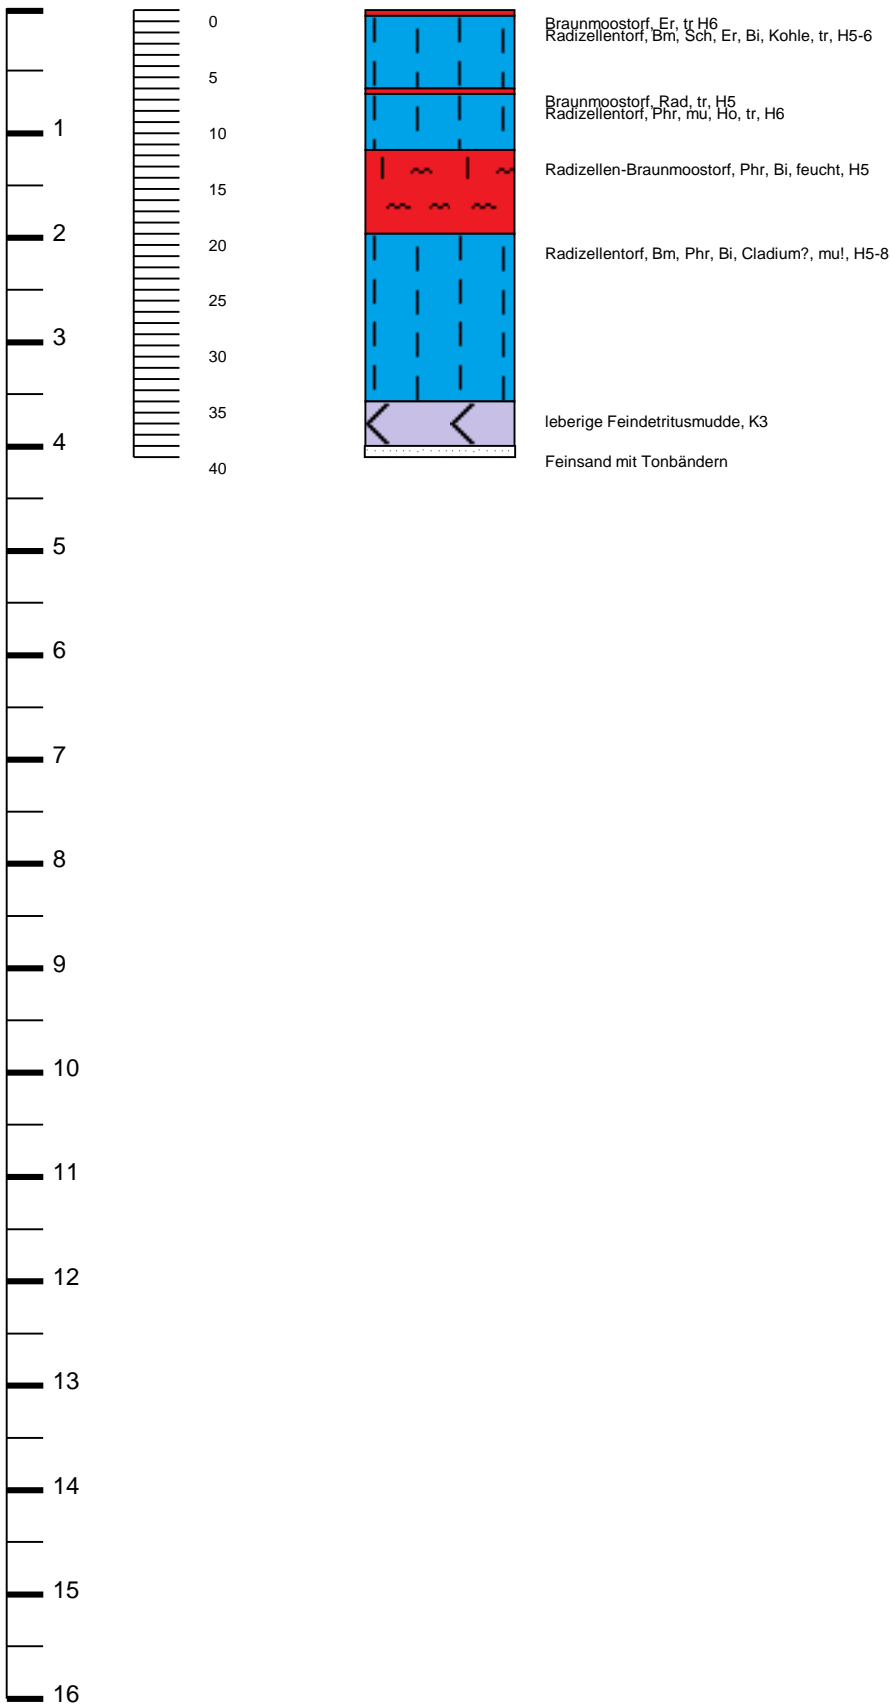

# M 520

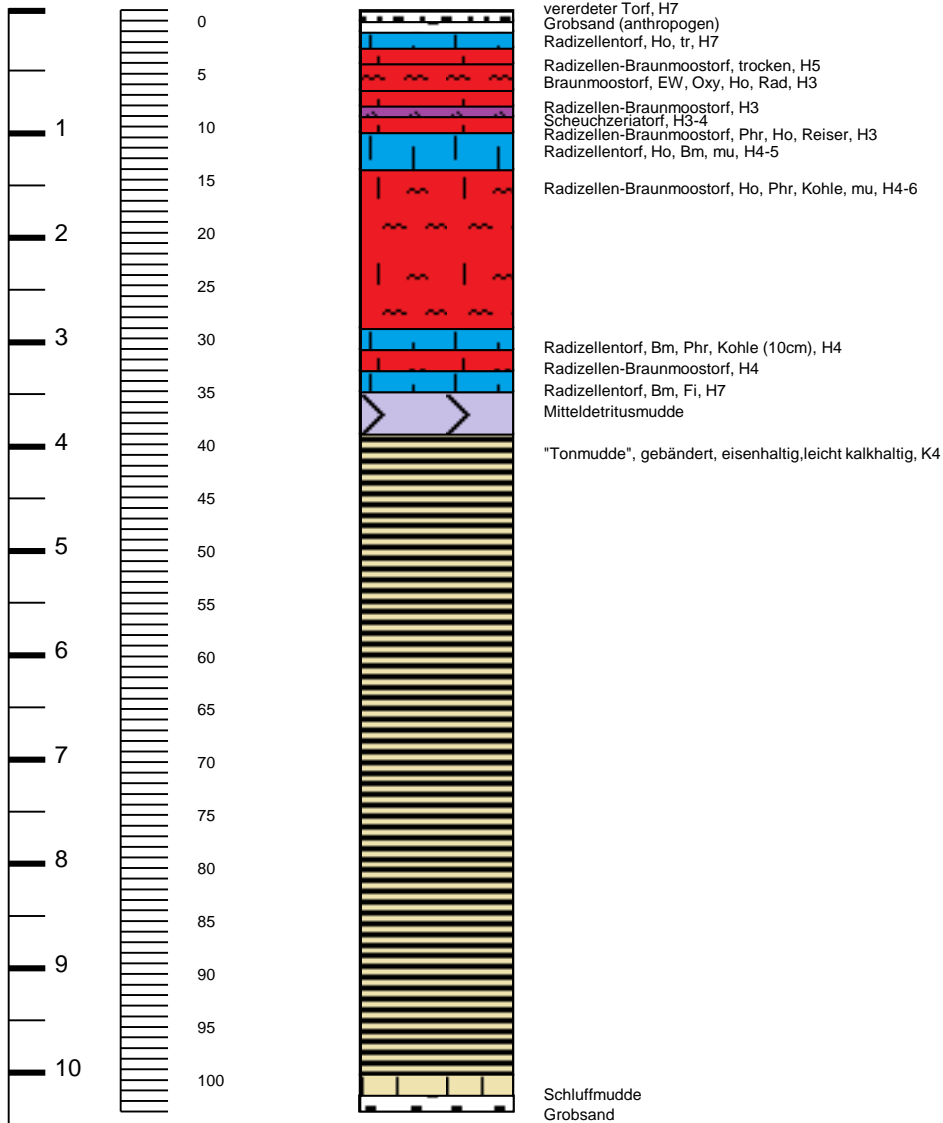

# M 521

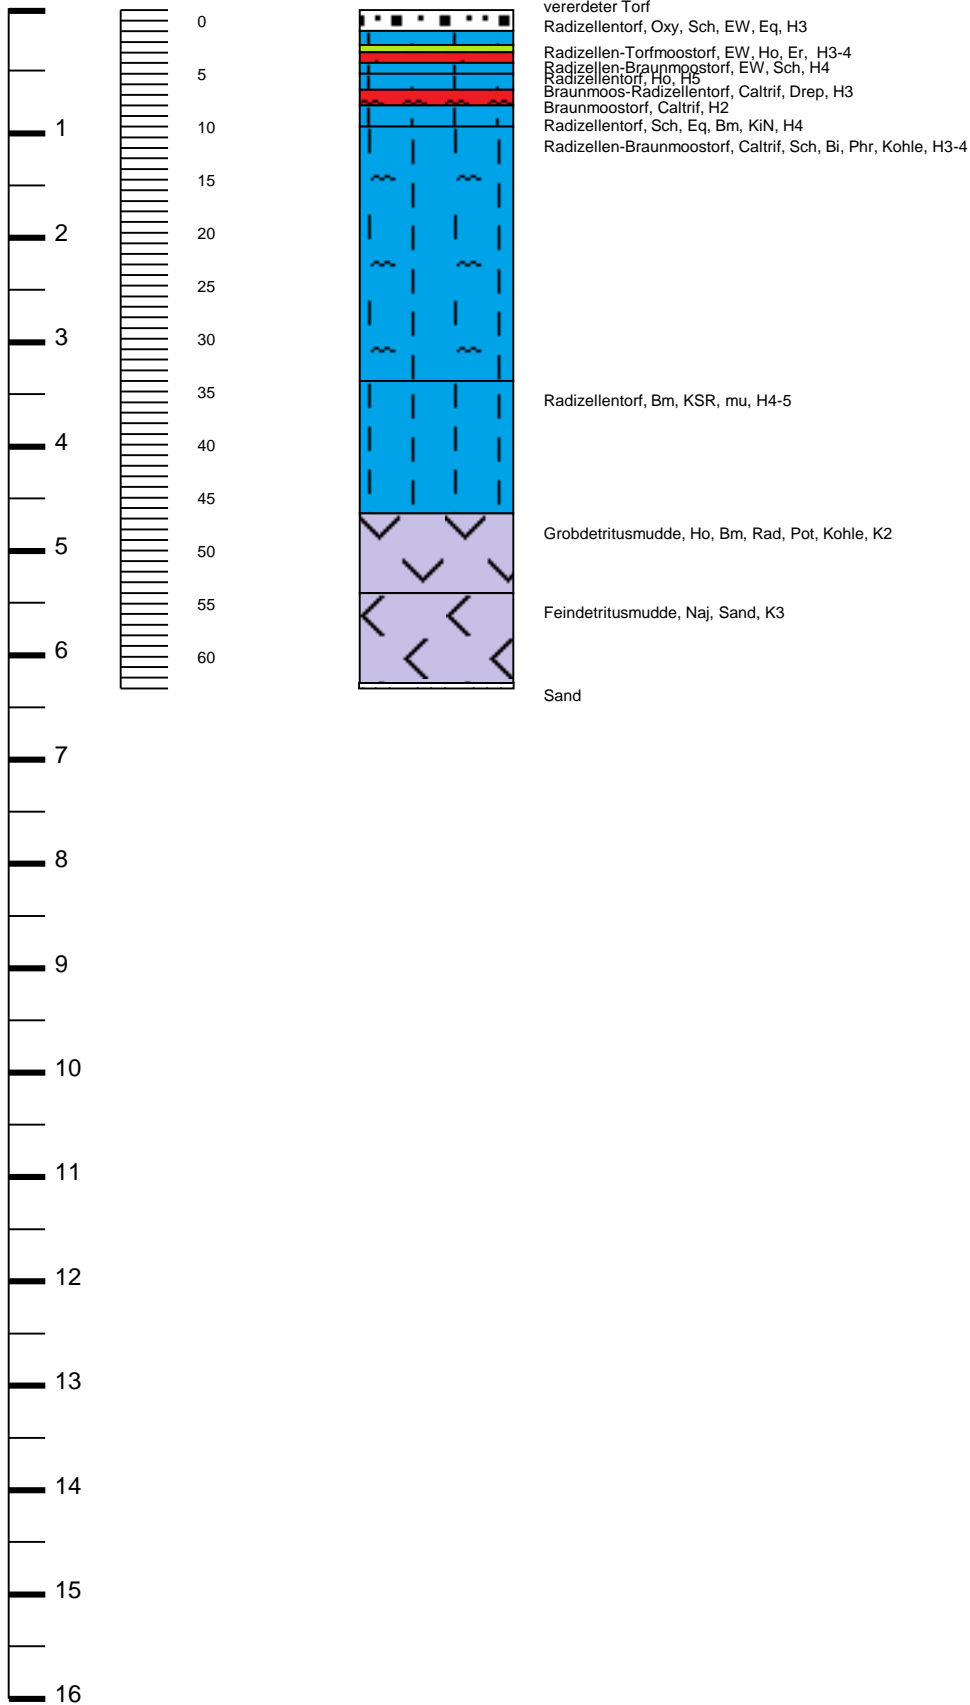

# M 523

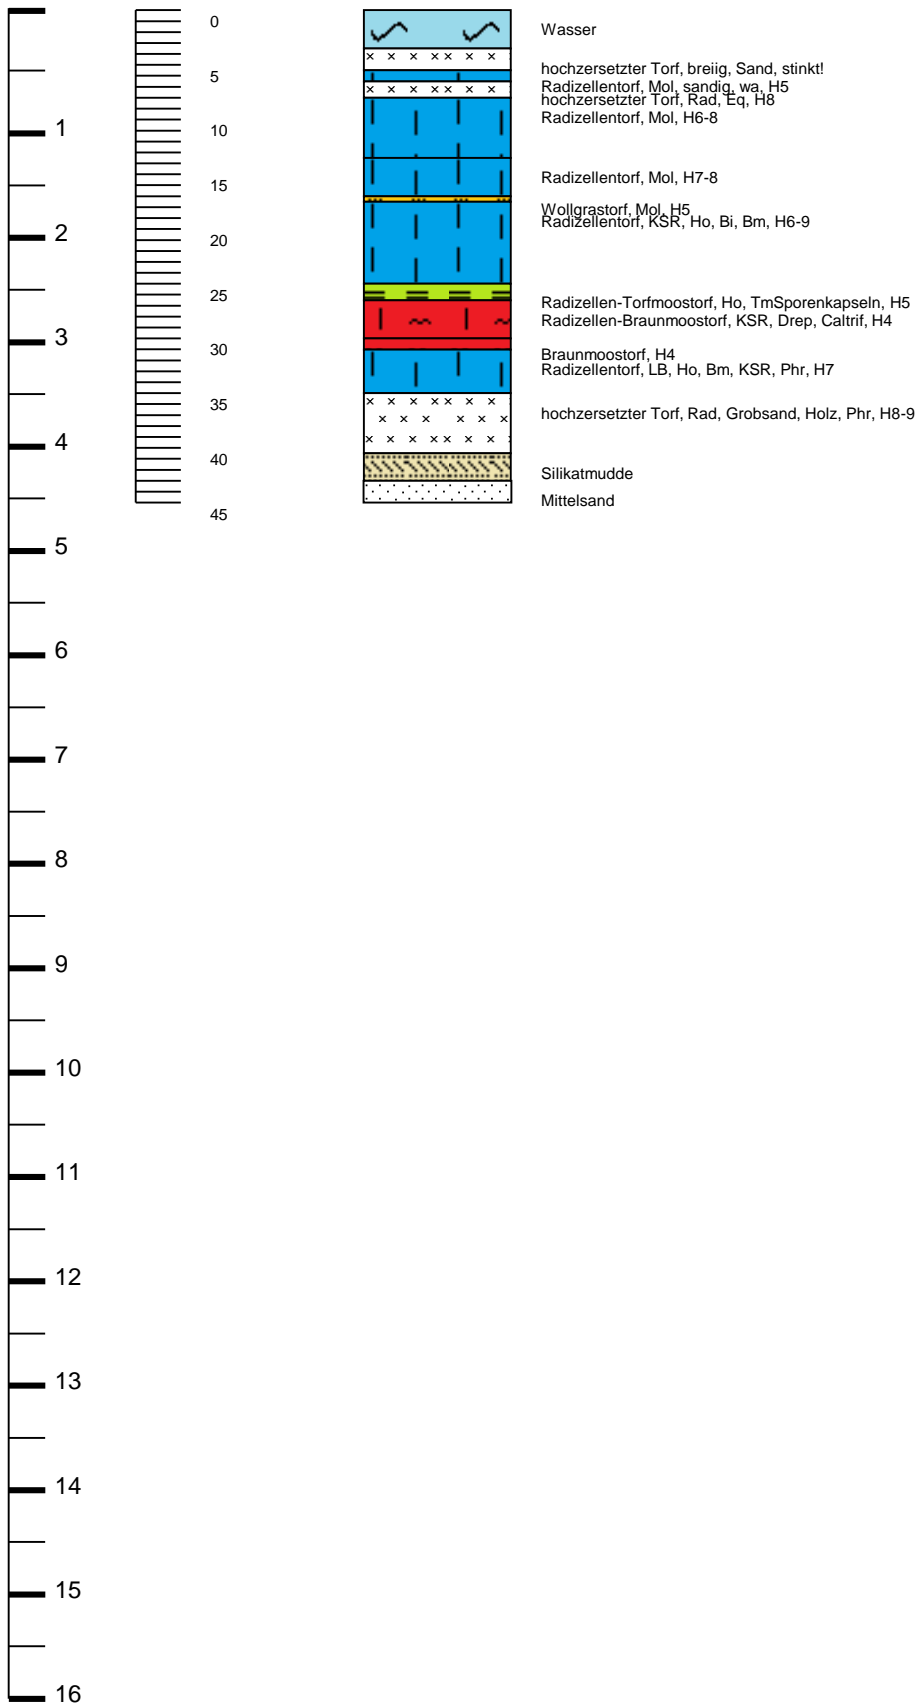

# M 524

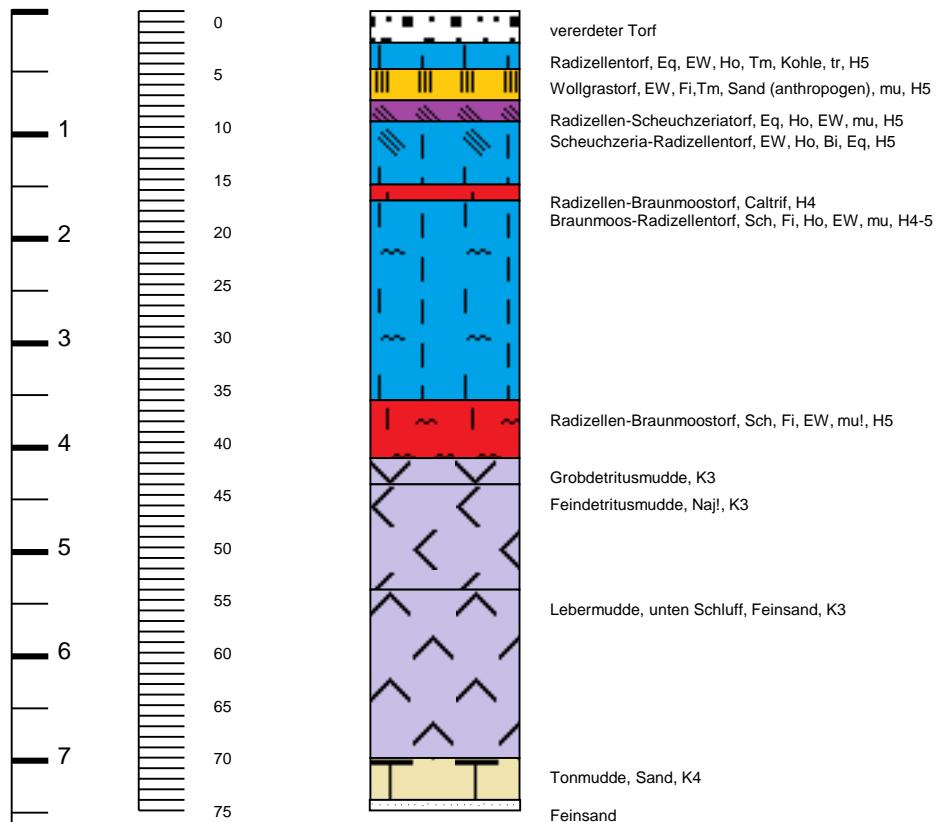

# M 619

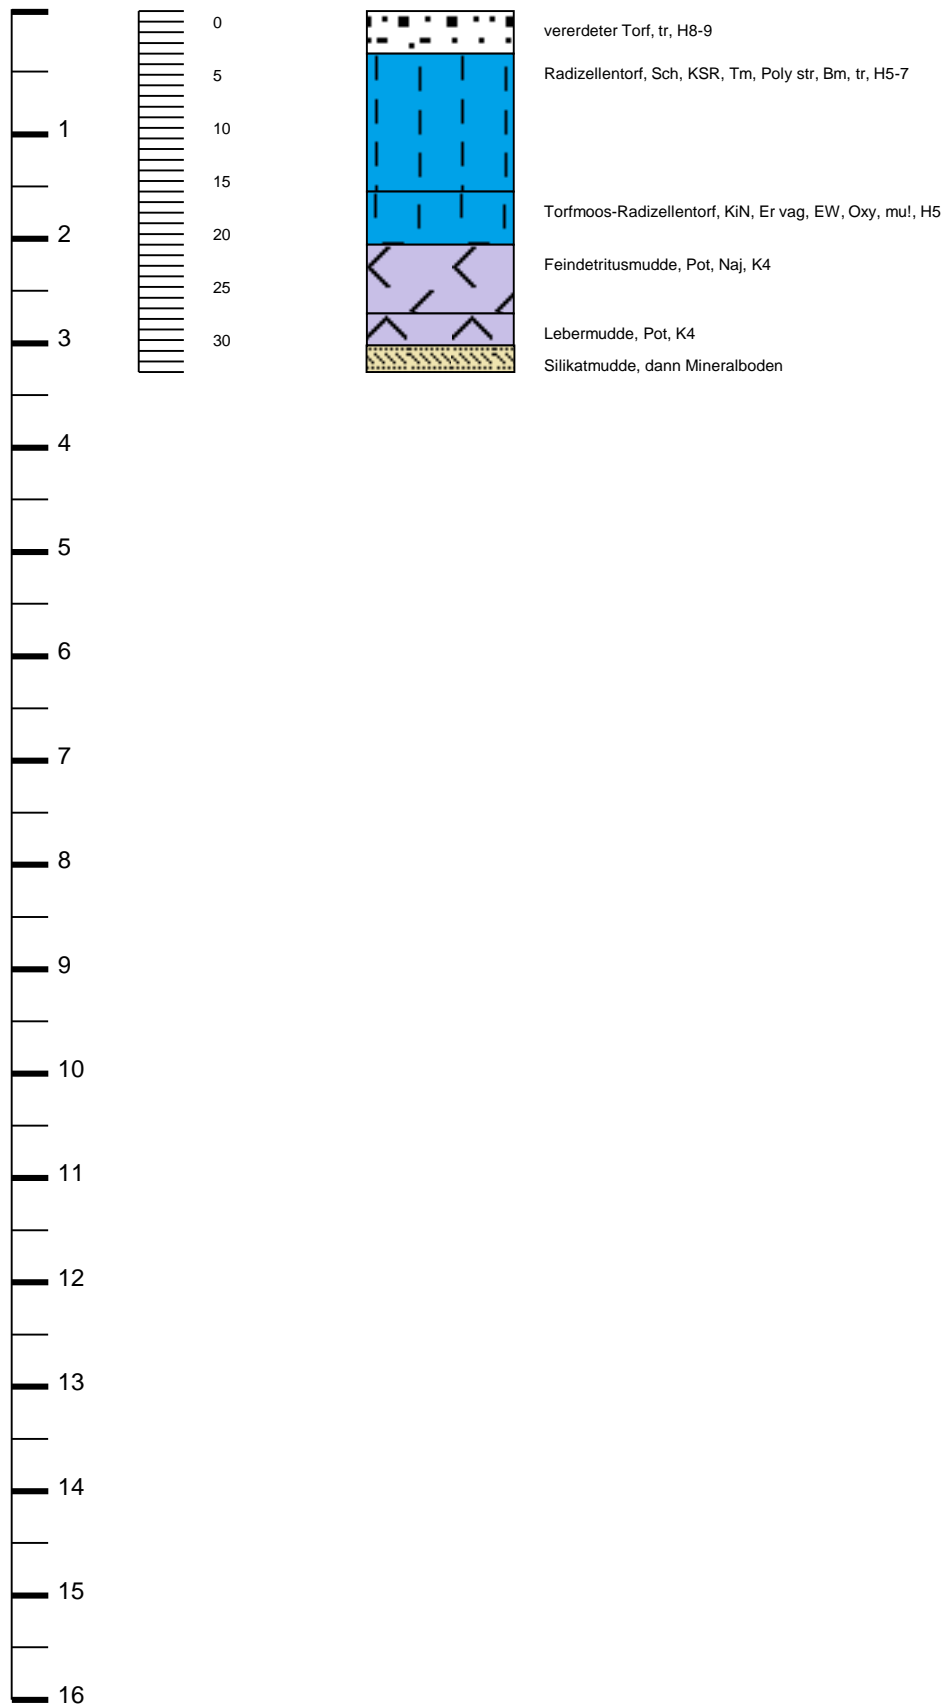

# M 626

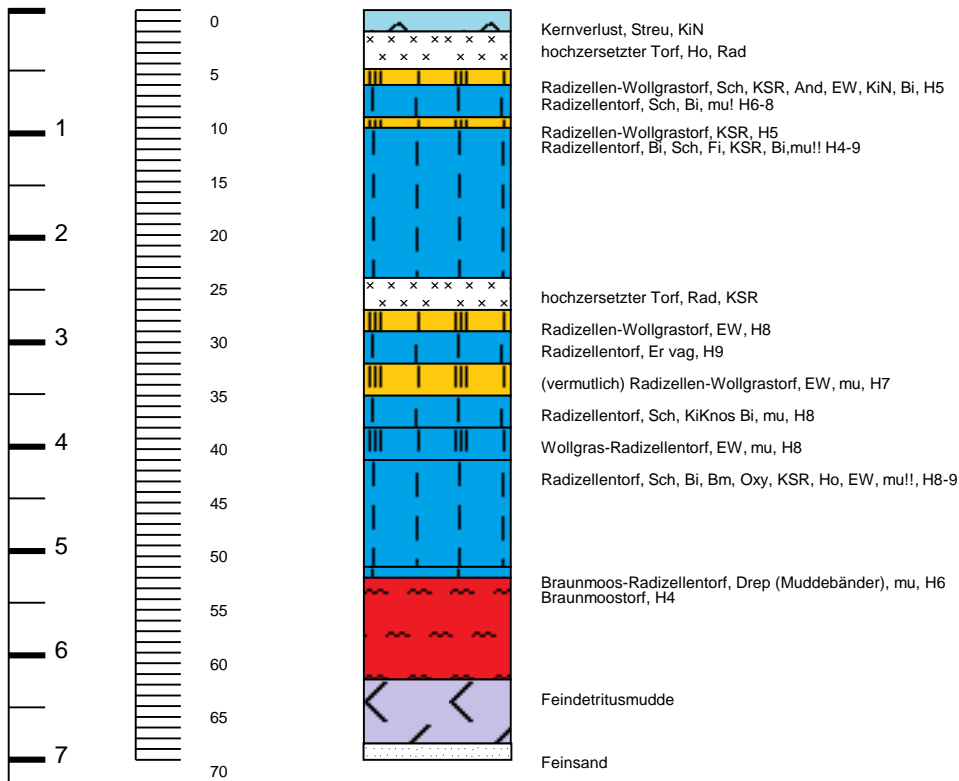

Supplement: Supplementary file 1 [file 1 › tbsm_a_1523229_sm4494.pdf]
