# Supplementary material
Source: publisher figshare collection journal article supplement (https://tandf.figshare.com/articles/dataset/_/7152566)
Supplement: Supplementary file 1 [file 1]

Archive with 2 entries (2 files):
- tbsm_a_1523229_sm4494.pdf
- tbsm_a_1523229_sm4493.pdf
