# Supplementary material
Source: publisher figshare collection journal article supplement (https://tandf.figshare.com/articles/dataset/_/7152566)

# Supplementary Materials

## Supplementary Data 1.

Map with 49 peat profiles.

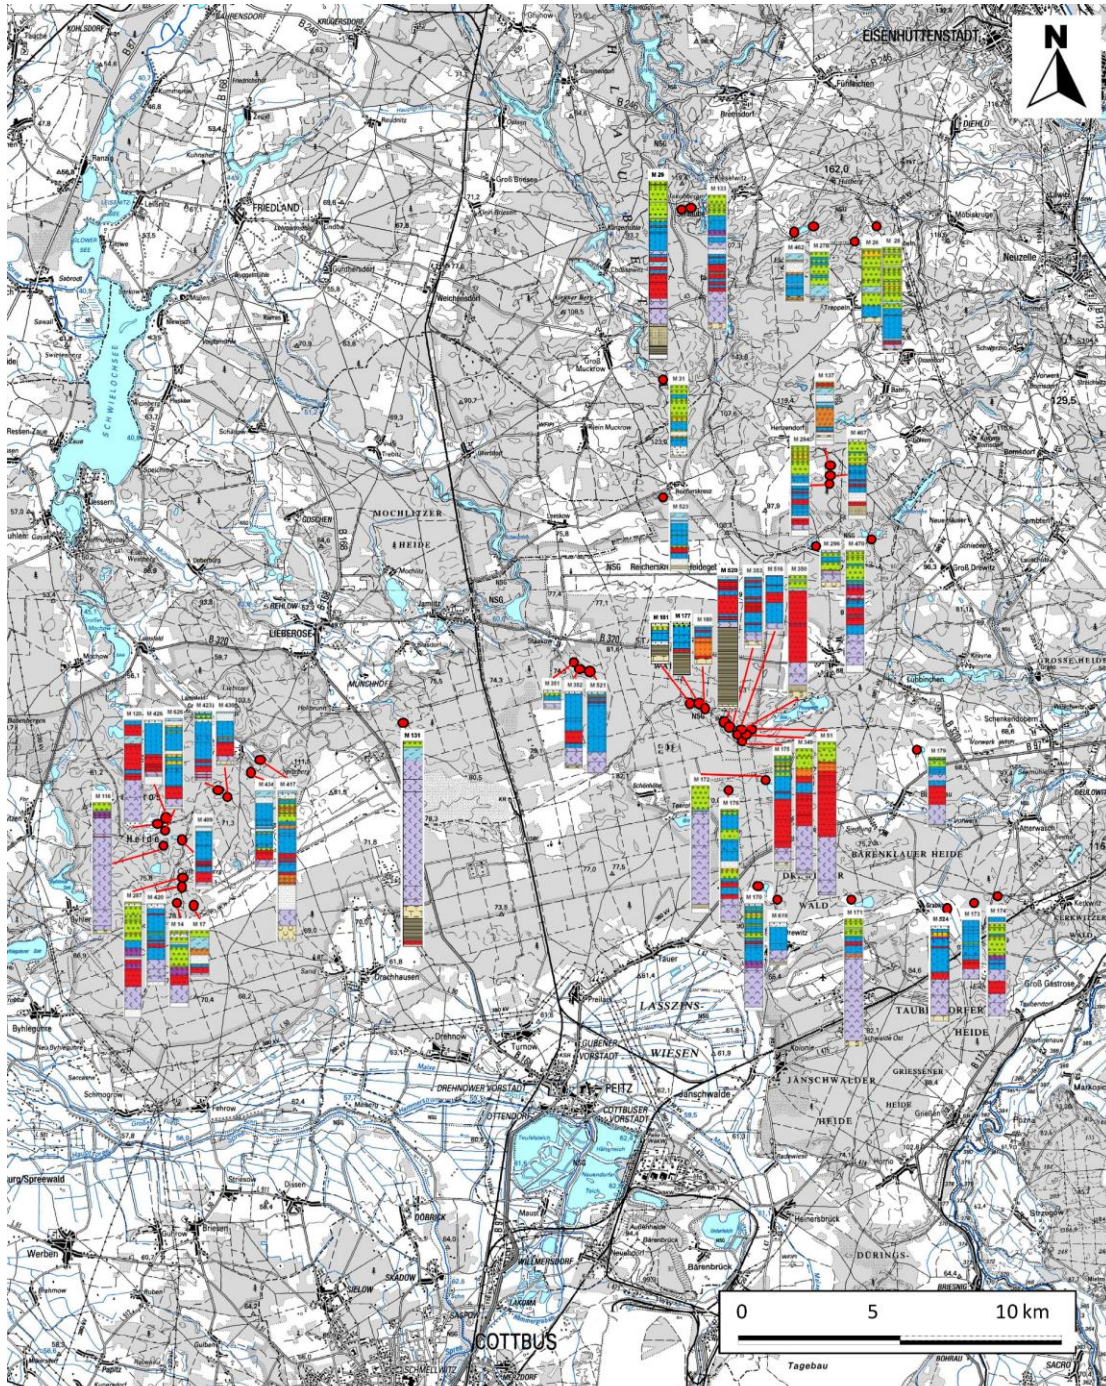

Supplement: Supplementary file 1 [file 1 › tbsm_a_1523229_sm4493.pdf]
